# Supplementary material for: Stepwise photosensitized C(sp3)–C(CO) bond cleavage and C–P bond formation of 1,3-dicarbonyls with arylphosphine oxides
Source: Royal Society of Chemistry journal article supplement (doi:10.1039/c9qo00075e), 2019-01-01
Supplement: c9qo00075e1.pdf [file c9qo00075e1.pdf]

*Supporting information for*

**Stepwise Photosensitized C(sp<sup>3</sup>)-C(CO) Bond Cleavage and C-P Bond  
Formation of 1,3-Dicarbonyls with Arylphosphine Oxides**

Xiuli Zhao,<sup>#</sup> Mengmeng Huang,<sup>#</sup> Yabo Li, Jianye Zhang, Jung Keun Kim,<sup>\*</sup> and Yangjie Wu<sup>\*</sup>

*College of Chemistry and Molecular Engineering, Henan Key Laboratory of Chemical Biology and Organic Chemistry, Key Laboratory of Applied Chemistry of Henan Universities, Zhengzhou University, Zhengzhou 450052, P.R. China.*

**Contents:**

|                                                                                                                                      |    |
|--------------------------------------------------------------------------------------------------------------------------------------|----|
| 1. General information .....                                                                                                         | 2  |
| 2. Experimental Procedure .....                                                                                                      | 2  |
| 3. Control Experiments .....                                                                                                         | 3  |
| 4. UV/VIS Absorption spectra, Cyclic Voltammetry, Luminescence Quenching Experiments and Data processing of compounds <b>3</b> ..... | 8  |
| 5. UV/VIS Absorption spectra, Luminescence excitation spectra, and Elemental analysis of the complexes <b>7</b> .....                | 12 |
| 6. Characterization data .....                                                                                                       | 14 |
| 7. The NMR spectra .....                                                                                                             | 20 |
| 8. The IR spectra of the complexes <b>7</b> .....                                                                                    | 46 |
| 9. Determination of Structure of <b>3a</b> .....                                                                                     | 51 |

## 1. General information

All reactions were performed under Ar atmosphere using quartz tube. Organophosphorous reagents **2a-c** and 1,3-dicarbonyl compound **1a** were purchased from commercial suppliers and used without further purification. (Hetero)Aryl substituted 1,3-diketones **1b-1s** were prepared according to the literature procedures.<sup>1</sup> Silica gel was purchased from Qing Dao Hai Yang Chemical Industry. <sup>1</sup>H NMR and <sup>13</sup>C NMR spectra was recorded on a Bruker DPX-400 spectrometer with solvent signals as internal reference. <sup>31</sup>P NMR spectra was recorded at 160 MHz on Bruker DPX-400, the chemical shifts  $\delta$  are reported relative to H<sub>3</sub>PO<sub>4</sub> ( $\delta = 0$  ppm) as internal standard. The multiplicity of signals is designated by the following abbreviations: s (singlet), d (doublet), t (triplet), q (quartet), m (multiplet), dd = doublet of doublet. Coupling constants *J* are reported in Hertz (Hz). High resolution mass spectra (HRMS) were obtained on an Agilent LC-MSD-Trap-XCT spectrometer with micromass MS software using electrospray ionisation (ESI). The UV/VIS Absorption spectra was recorded in DMSO on a Perkin Elmer Lambda 35 Spectrometer. The Cyclic voltammetry (CV) was recorded in DMSO by CHI650A. The Luminescence Quenching Experiments were recorded using a F-4500 FL Spectrophotometer in DMSO.

## 2. Experimental Procedure

**Synthesis of  $\beta$ -ketophosphine oxides (**3**).** 1-phenylbutane-1,3-dione (0.2 mmol), diphenylphosphine oxide (0.6 mmol), FI (0.01 mmol) and benzoyl peroxide (BPO) (wetted with ca. 25% H<sub>2</sub>O, 0.6 mmol) were combined in DMSO / H<sub>2</sub>O (1.6 mL / 0.4 mL) in Ar atmosphere. The mixture was stirred at room temperature under green LED lamp (3 W) for 12 hours. The reaction mixture was purified by chromatography on silica gel (elute: EtOAc / Petroleum ether 1 / 1-3 / 1, v / v) to give the desired product.

**Synthesis of 3-EuCl<sub>3</sub> (**7**) complexes.** General procedure for EuCl<sub>3</sub>-**3** complexes described here.  $\beta$ -Ketophosphine oxides **3** (50 mg, 0.15 mmol) and 1/3 molar equivalent of EuCl<sub>3</sub>·6H<sub>2</sub>O were dissolved in CH<sub>3</sub>CN (~15 mL) and stirred at room temperature for thirty minutes. The solvent was removed under reduced pressure, and the crude product is washed three times with ether to obtain white powders.

### 3. Control Experiments

Scheme S1. Control experiments

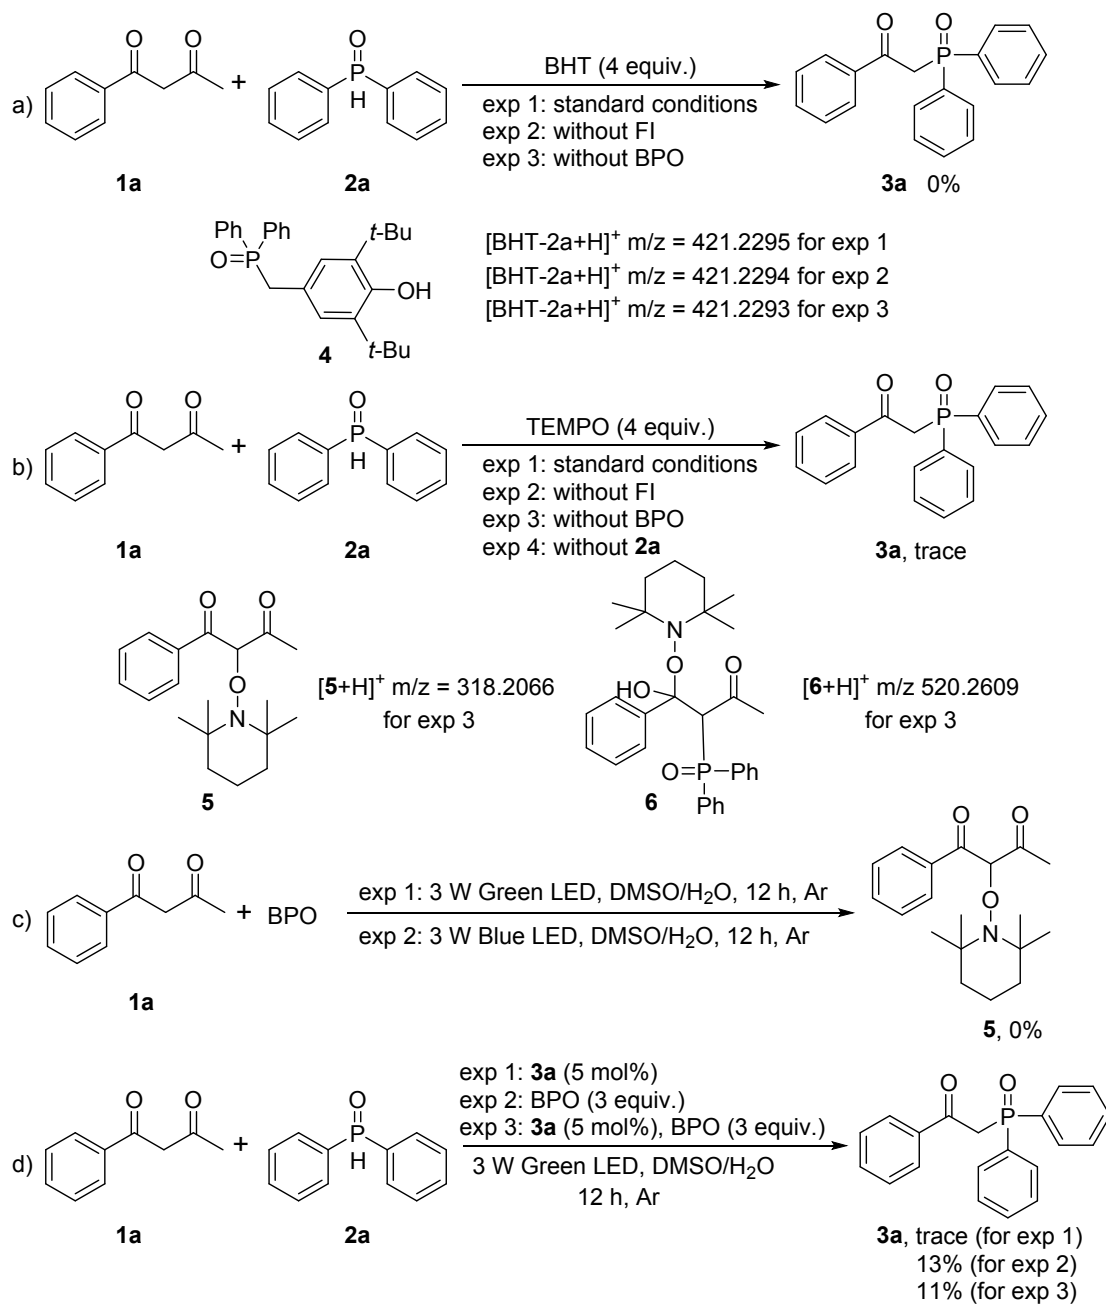

|               |           |             |        |                 |              |                        |                      |
|---------------|-----------|-------------|--------|-----------------|--------------|------------------------|----------------------|
| Sample Name   | ZXL-372   | Position    | P1-C6  | Instrument Name | Instrument 1 | User Name              | Agilent FSE          |
| Inj Vol       | 0.1       | InjPosition |        | SampleType      | Sample       | IRM Calibration Status | Success              |
| Data Filename | ZXL-372.d | ACQ Method  | test.m | Comment         |              | Acquired Time          | 9/28/17 Thu 16:22:46 |

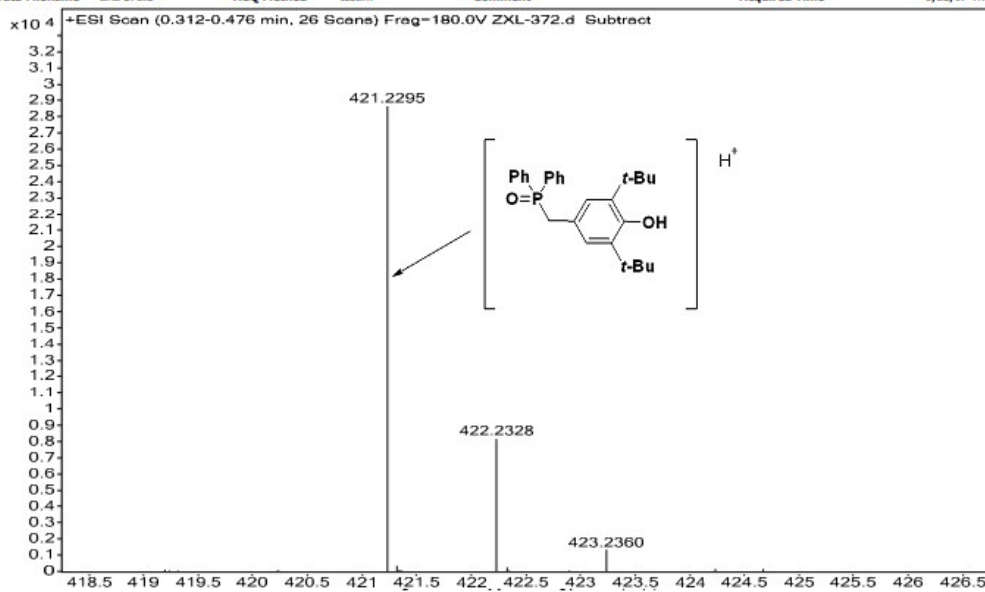

Figure S1 HRMS spectrum of compound  $[4+H]^+$  for exp 1

|               |           |             |        |                 |              |                        |                      |
|---------------|-----------|-------------|--------|-----------------|--------------|------------------------|----------------------|
| Sample Name   | ZXL-370   | Position    | P1-C4  | Instrument Name | Instrument 1 | User Name              | Agilent FSE          |
| Inj Vol       | 0.1       | InjPosition |        | SampleType      | Sample       | IRM Calibration Status | Success              |
| Data Filename | ZXL-370.d | ACQ Method  | test.m | Comment         |              | Acquired Time          | 9/28/17 Thu 16:18:11 |

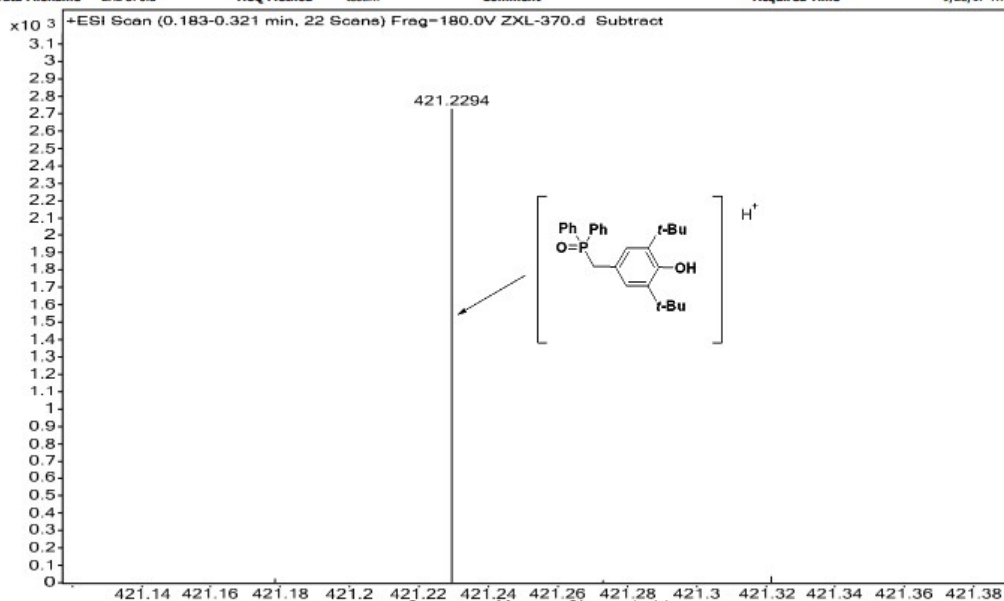

Figure S2 HRMS spectrum of compound  $[4+H]^+$  for exp 2

|               |           |             |        |                 |              |                        |                      |
|---------------|-----------|-------------|--------|-----------------|--------------|------------------------|----------------------|
| Sample Name   | ZXL-371   | Position    | P1-C5  | Instrument Name | Instrument 1 | User Name              | Agilent FSE          |
| Inj Vol       | 0.1       | InjPosition |        | SampleType      | Sample       | IRM Calibration Status | Success              |
| Data Filename | ZXL-371.d | ACQ Method  | test.m | Comment         |              | Acquired Time          | 9/28/17 Thu 16:19:27 |

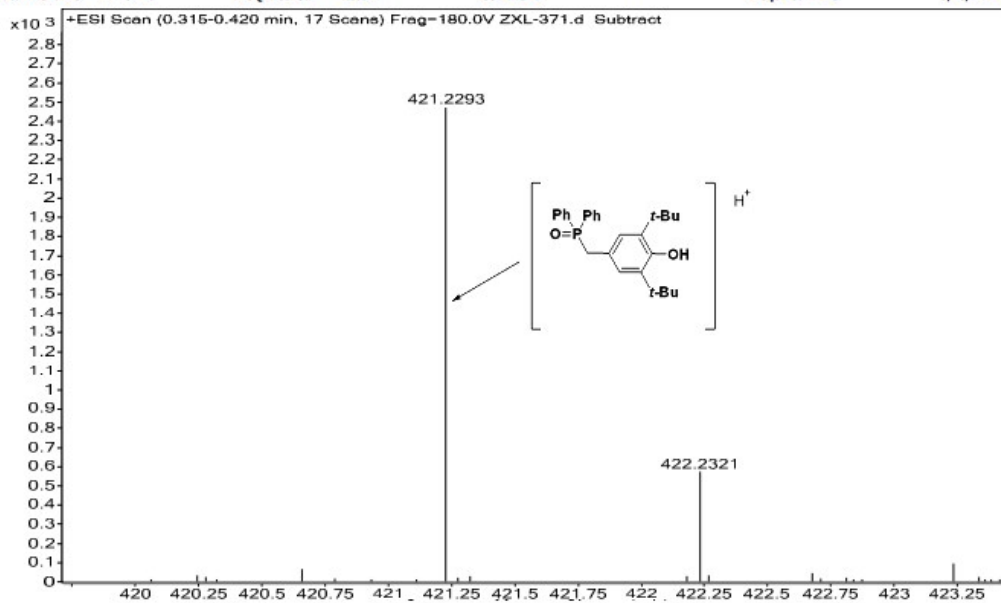

Figure S3 HRMS spectrum of compound [4+H]<sup>+</sup> for exp 3

|               |           |             |        |                 |              |                        |                      |
|---------------|-----------|-------------|--------|-----------------|--------------|------------------------|----------------------|
| Sample Name   | ZXL-374   | Position    | P1-C8  | Instrument Name | Instrument 1 | User Name              | Agilent FSE          |
| Inj Vol       | 0.1       | InjPosition |        | SampleType      | Sample       | IRM Calibration Status | Success              |
| Data Filename | ZXL-374.d | ACQ Method  | test.m | Comment         |              | Acquired Time          | 9/28/17 Thu 16:25:18 |

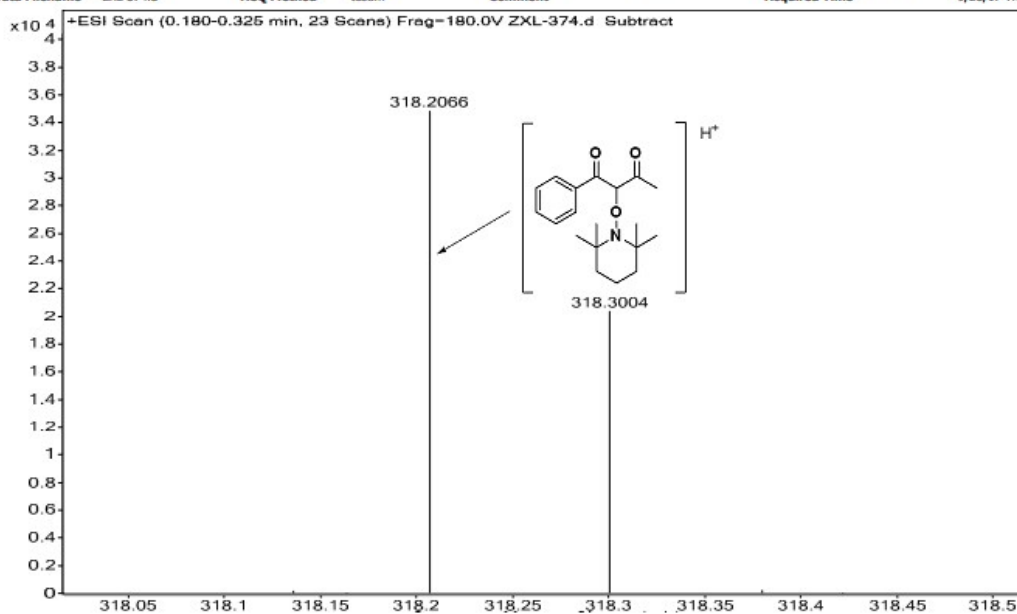

Figure S4 HRMS spectrum of compound [5+H]<sup>+</sup> for exp 3

|               |           |             |        |                 |              |                        |                      |
|---------------|-----------|-------------|--------|-----------------|--------------|------------------------|----------------------|
| Sample Name   | ZXL-374   | Position    | PI-C8  | Instrument Name | Instrument 1 | User Name              | Agilent FSE          |
| Inj Vol       | 0.1       | InjPosition |        | SampleType      | Sample       | IRM Calibration Status | Success              |
| Data Filename | ZXL-374.d | ACQ Method  | test.m | Comment         |              | Acquired Time          | 9/28/17 Thu 16:25:18 |

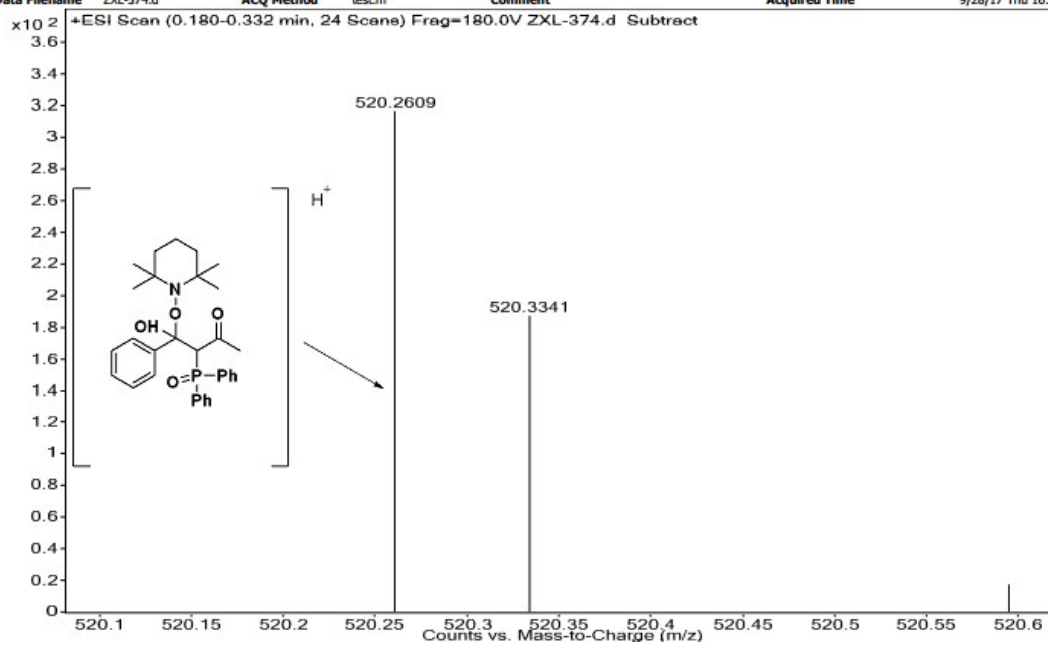

Figure S5 HRMS spectrum of compound [6+H]<sup>+</sup> for exp 3

**Scheme S2.** The Yield of **3a** use different volume ratio of DMSO and H<sub>2</sub>O

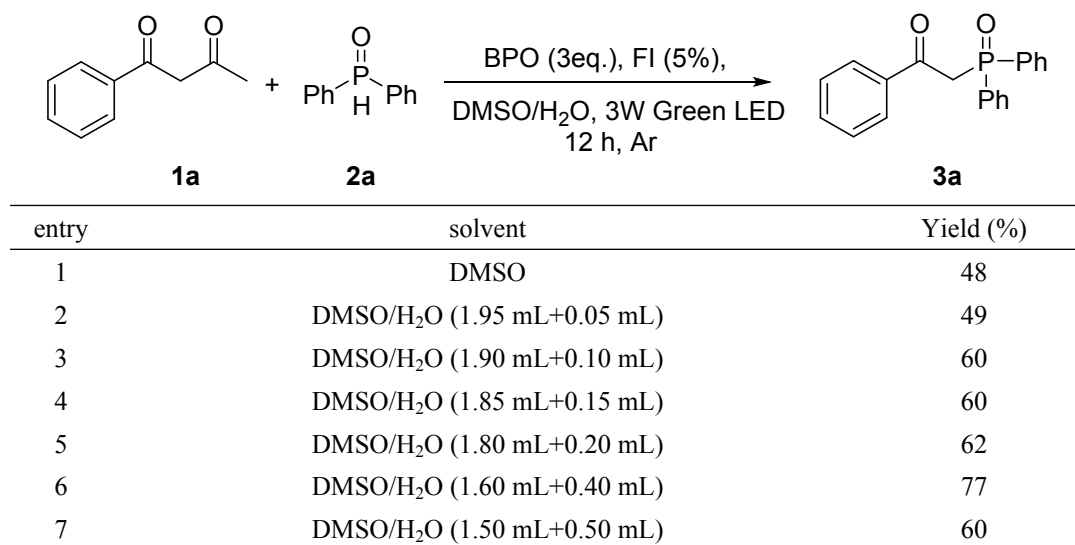

**Scheme S3.** Photocatalytic activity of BPO

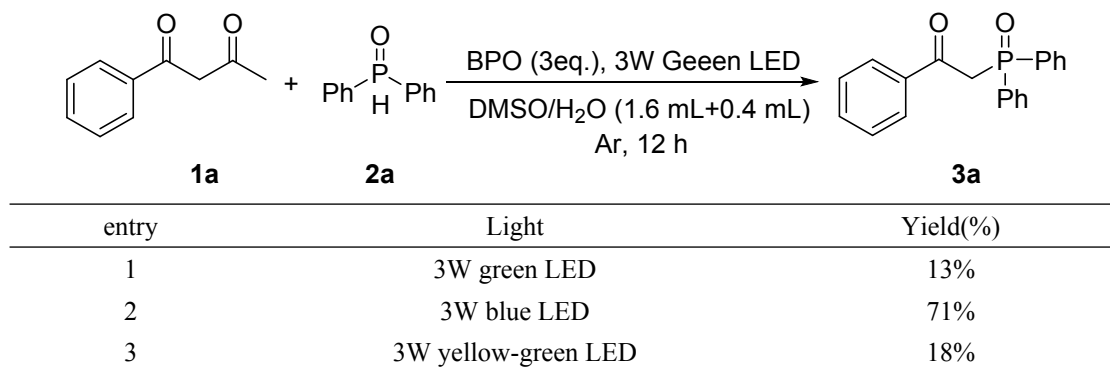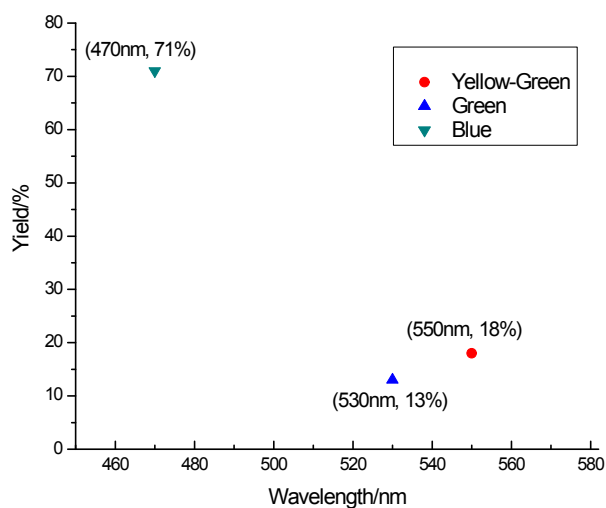

**Figure S6.** Photocatalytic activity of BPO

## 4. UV/VIS Absorption spectra, Cyclic Voltammetry, Luminescence Quenching Experiments and Data processing of compounds 3

### 1) UV/VIS Absorption spectra

The UV/VIS Absorption spectra was recorded in DMSO of a 0.1 M solution in 10 mm path length quartz cuvette on a Perkin Elmer Lambda 35 Spectrometer.

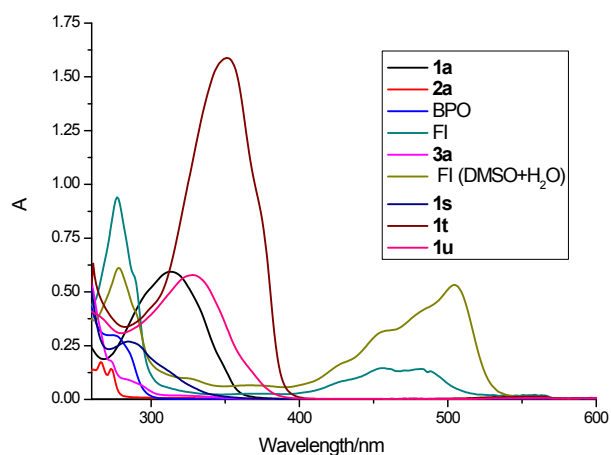

**Figure S7.** Absorption spectra of 1-phenylbutane-1,3-dione **1a** ( $\lambda_{\max} = 357$  nm), diphenylphosphine oxide **2a** ( $\lambda_{\max} = 281$  nm), **FI** ( $\lambda_{\max} = 512$  nm), **BPO** ( $\lambda_{\max} = 298$  nm), **3a** ( $\lambda_{\max} = 259$  nm), ethyl 3-oxo-3-phenylpropanoate **1s** ( $\lambda_{\max} = 335$  nm), 1,3-diphenylpropane-1,3-dione **1t** ( $\lambda_{\max} = 335$  nm), 1-(thiophen-2-yl)butane-1,3-dione **1u** ( $\lambda_{\max} = 391$  nm), in DMSO (0.1 mM). **FI** ( $\lambda_{\max} = 531$  nm, in DMSO/H<sub>2</sub>O, 0.1 mM).

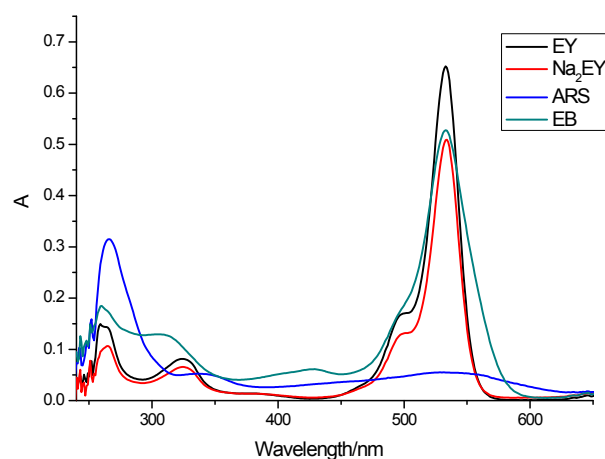

**Figure S8.** Absorption spectra of different photocatalyst: EY ( $\lambda_{\max} = 557$  nm), Na<sub>2</sub>EY ( $\lambda_{\max} = 556$  nm), ARS ( $\lambda_{\max} = 620$  nm), EB ( $\lambda_{\max} = 579$  nm), in DMSO (0.1 mM)



## 2) Cyclic Voltammetry

Cyclic voltammetry was measured under Ar atmosphere with a Ar balloon protection with conventional three-electrode system (Reference electrode: Ag/AgCl, working electrode: Glassy carbon, counter electrode: Pt wire, Supporting electrolyte: 0.1 M TBAPF<sub>6</sub> in DMSO) at 50 mV/sec of scan rate.

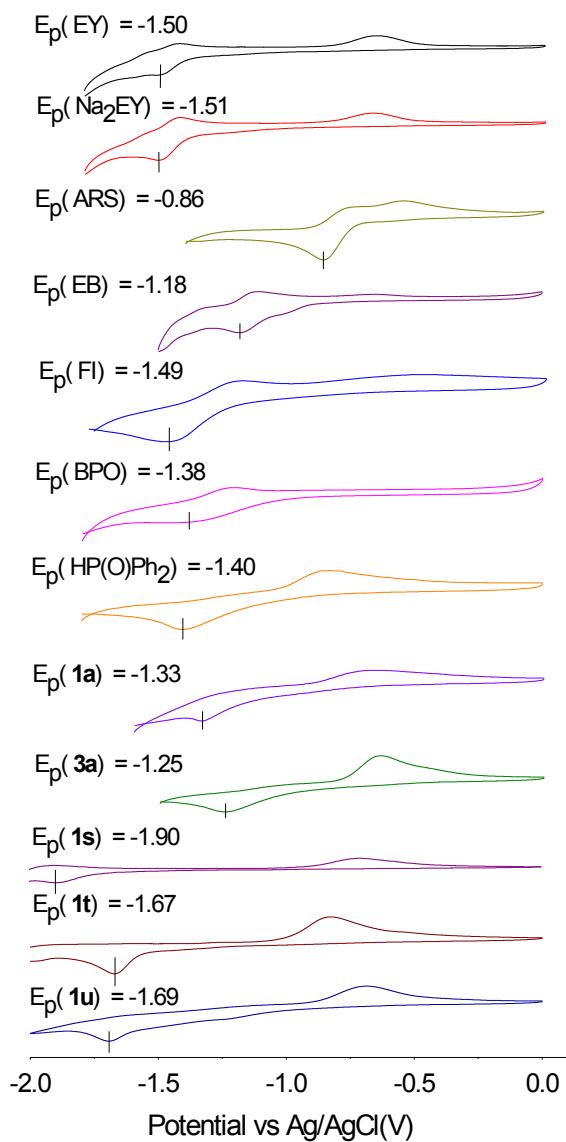

**Figure S9.** CV of Reaction reagents (1 mM in DMSO)

### 3) Luminescence Quenching Experiments

Emission intensities were recorded using a F-4500 FL Spectrophotometer. First, all FI solutions were excited at 450 nm and the emission intensity at 460 nm was observed. In a typical experiment, the emission spectrum of a  $5 \times 10^{-5}$  M solution of FI and different concentration of 1-phenylbutane-1,3-dione **1a**, diphenylphosphine oxide **2a** and BPO in DMSO in 10 mm path length quartz cuvette was collected. The BPO solution was excited at 260 nm and the emission intensity at 280 nm was observed. In a typical experiment, the emission spectrum of a  $5 \times 10^{-5}$  M solution of BPO and different concentration (0.010~0.125 mM) of diphenylphosphine oxide **2a** in DMSO in 10 mm path length quartz cuvette was collected.

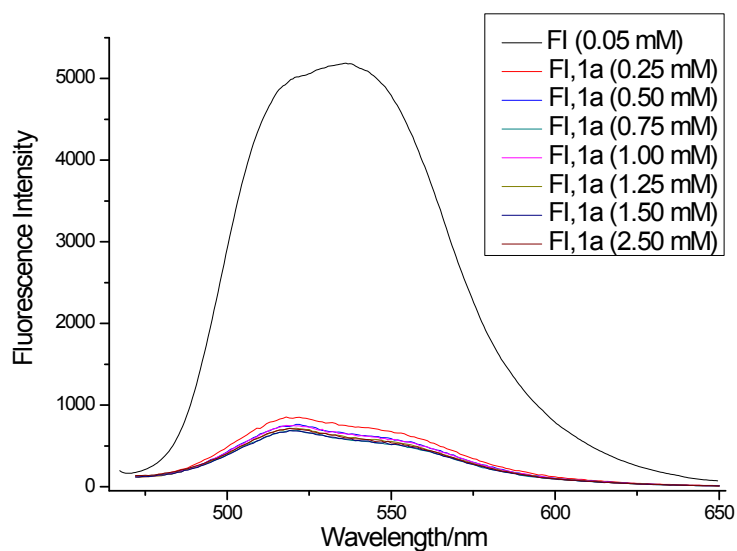

**Figure S10.** Luminescence quenching experiments of FI with **1a**

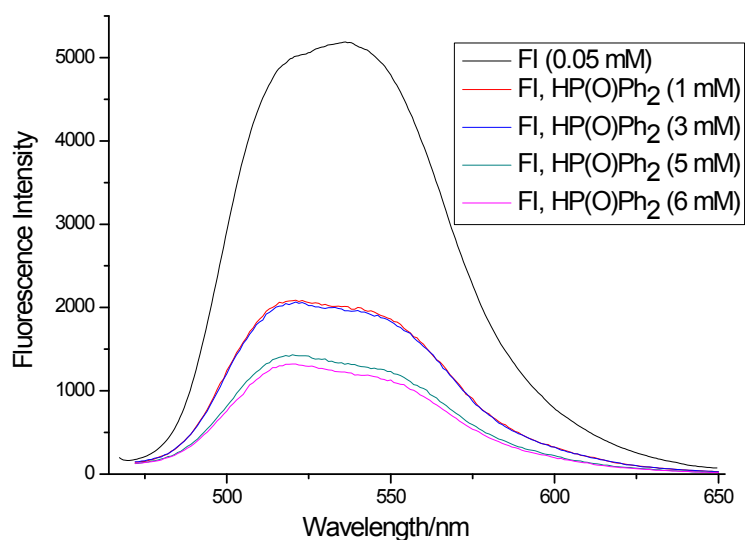

**Figure S11.** Luminescence quenching experiments of FI with **2a**

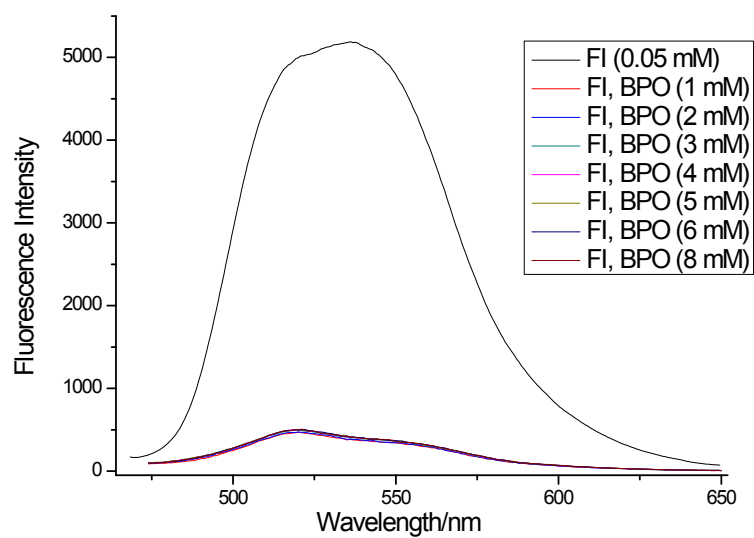

**Figure S12.** Luminescence quenching experiments of FI with BPO

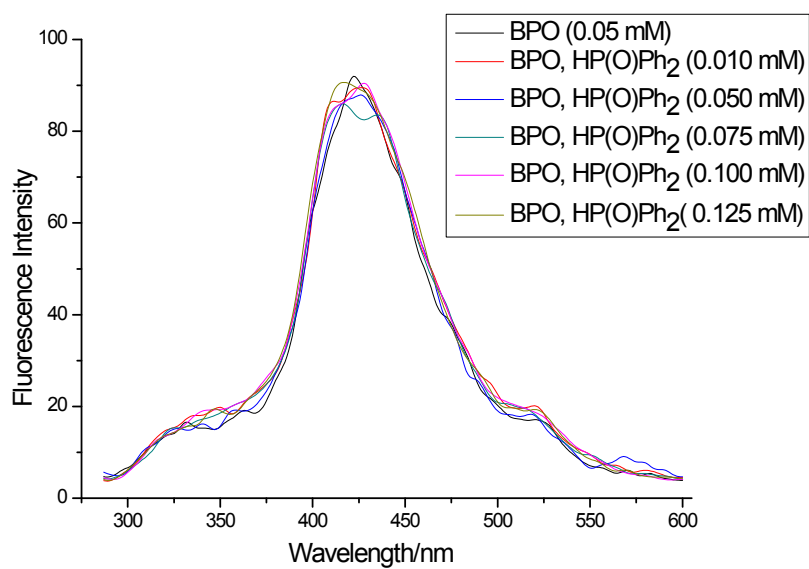

**Figure S13.** Luminescence quenching experiments of BPO with **2a**

#### 4) Data processing

With the reversible reduction waves of all the reagents in hand, we calculated the excited redox potential,  $E_g$  of different reagents.

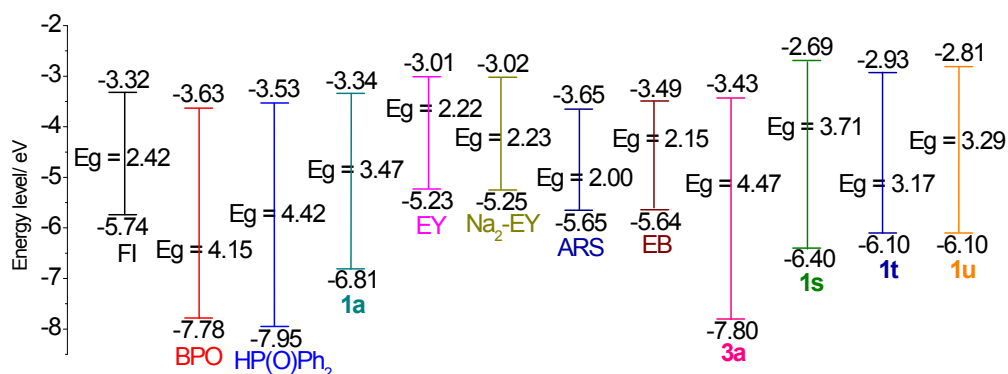

Figure S14. The  $E_{HOMO}$ ,  $E_{LUMO}$  and  $E_g$  of different reagents

### 5. UV/VIS Absorption spectra, Luminescence excitation spectra, and Elemental analysis of the complexes 7

#### 1) UV/VIS Absorption spectra

The UV/VIS absorption spectra of the **3**-EuCl<sub>3</sub>(**7**) complexes were recorded in CH<sub>3</sub>CN of a 2 M solution in 10 mm path length quartz cuvette on a Perkin Elmer Lambda 35 Spectrometer.

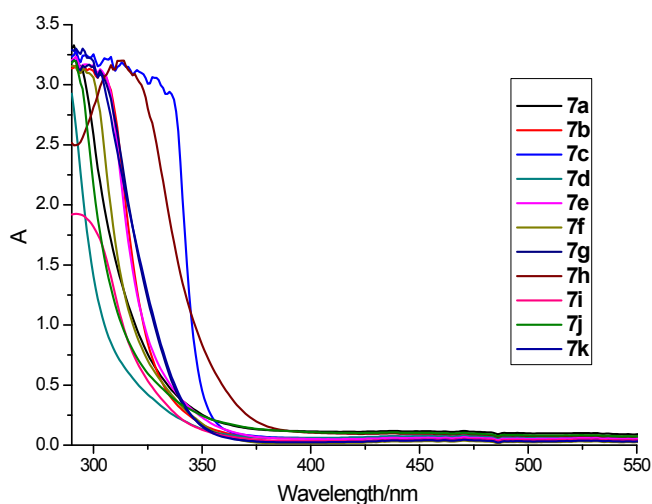

Figure S15. Absorption spectra of **7a** ( $\lambda_{max} = 327$  nm), **7b** ( $\lambda_{max} = 328$  nm), **7c** ( $\lambda_{max} = 351$  nm), **7d** ( $\lambda_{max} = 310$  nm), **7e** ( $\lambda_{max} = 330$  nm), **7f** ( $\lambda_{max} = 321$  nm), **7g** ( $\lambda_{max} = 341$  nm), **7h** ( $\lambda_{max} = 351$  nm), **7i** ( $\lambda_{max} = 327$  nm), **7j** ( $\lambda_{max} = 317$  nm), **7k** ( $\lambda_{max} = 341$  nm) in CH<sub>3</sub>CN (2 mM).

## 2) Luminescence excitation spectra

Luminescence excitation spectra of the  $3\text{-EuCl}_3$  (**7**) complexes were recorded in  $\text{CH}_3\text{CN}$  of a 2 M solution in 10 mm path length quartz cuvette on a F-4500 FL Spectrophotometer. The excited wavelength was 350 nm.

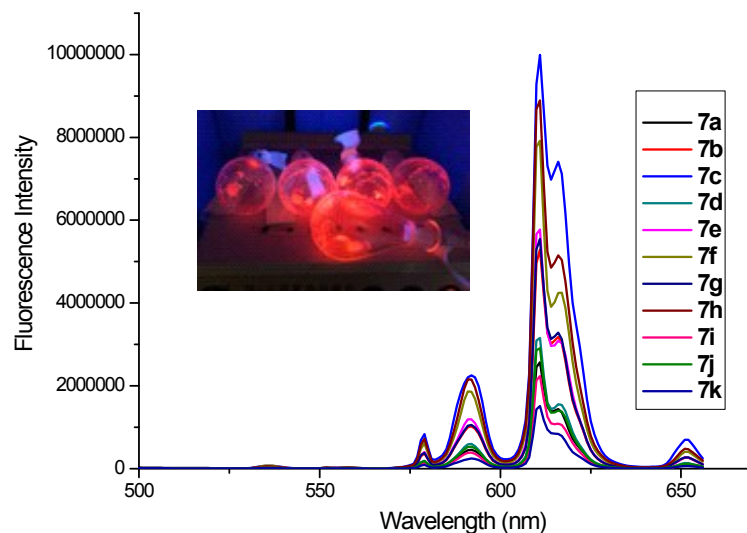

**Figure S16.** Luminescence excitation spectra of the  $3\text{-EuCl}_3$ -**3** complexes

The quantum yield values of the  $3\text{-EuCl}_3$ -**3** complexes excited at 300 nm in  $\text{CH}_3\text{CN}$ .

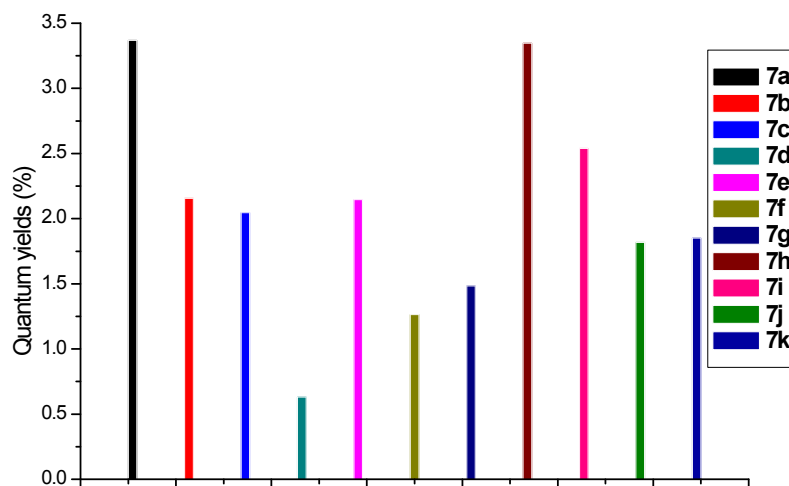

**Figure S17.** The quantum yield values of the complexes **7**

### 3) Scheme S4. Elemental analysis

| product   | structure                                                                                                        | C(fond) | H(fond) | anal. calcd C | anal. calcd H |
|-----------|------------------------------------------------------------------------------------------------------------------|---------|---------|---------------|---------------|
| <b>7a</b> | EuCl <sub>3</sub> -( <b>3a</b> ) <sub>2</sub> (H <sub>2</sub> O) <sub>10</sub>                                   | 44.53   | 4.70    | 44.52         | 5.04          |
| <b>7b</b> | EuCl <sub>3</sub> -( <b>3b</b> ) <sub>3</sub> (H <sub>2</sub> O) <sub>5</sub>                                    | 56.14   | 4.78    | 55.99         | 5.00          |
| <b>7c</b> | EuCl <sub>3</sub> -( <b>3c</b> ) <sub>3</sub> (H <sub>2</sub> O) <sub>6</sub>                                    | 52.95   | 4.59    | 53.38         | 4.91          |
| <b>7d</b> | EuCl <sub>3</sub> -( <b>3d</b> ) <sub>3</sub> (H <sub>2</sub> O) <sub>6</sub>                                    | 52.17   | 4.30    | 52.17         | 4.38          |
| <b>7e</b> | EuCl <sub>3</sub> -( <b>3f</b> ) <sub>2</sub> (H <sub>2</sub> O) <sub>3</sub>                                    | 47.84   | 3.55    | 47.71         | 4.00          |
| <b>7f</b> | EuCl <sub>3</sub> -( <b>3g</b> ) <sub>3</sub> (H <sub>2</sub> O) <sub>5</sub> (CH <sub>3</sub> CN) <sub>13</sub> | 52.55   | 4.55    | 52.22         | 4.78          |
| <b>7g</b> | EuCl <sub>3</sub> -( <b>3i</b> ) <sub>3</sub> (H <sub>2</sub> O) <sub>6</sub>                                    | 55.44   | 4.75    | 55.25         | 5.08          |
| <b>7h</b> | EuCl <sub>3</sub> -( <b>3j</b> ) <sub>3</sub> (H <sub>2</sub> O) <sub>5</sub>                                    | 54.36   | 4.83    | 54.07         | 4.83          |
| <b>7i</b> | EuCl <sub>3</sub> -( <b>3j</b> ) <sub>2</sub> (H <sub>2</sub> O) <sub>5</sub> (CH <sub>3</sub> CN) <sub>2</sub>  | 43.27   | 4.13    | 43.00         | 3.94          |
| <b>7j</b> | EuCl <sub>3</sub> -( <b>3d</b> ) <sub>3</sub> (H <sub>2</sub> O) <sub>6</sub>                                    | 48.72   | 4.10    | 48.75         | 3.95          |
| <b>7k</b> | EuCl <sub>3</sub> -( <b>3i</b> ) <sub>3</sub> (H <sub>2</sub> O) <sub>7</sub>                                    | 54.19   | 4.73    | 54.54         | 5.16          |

## 6. Characterization data

### 2-(diphenylphosphoryl)-1-phenylethan-1-one (**3a**)<sup>2</sup>

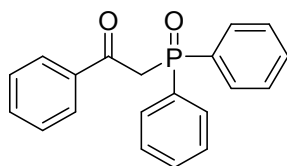

White solid; mp. 134.6-136.8 °C. <sup>1</sup>H NMR (CDCl<sub>3</sub>, 400 MHz): δ 7.98 (d, *J* = 7.3 Hz, 2H), 7.82-7.78 (m, 4H), 7.52-7.39 (m, 9H), 4.14 (d, *J* = 15.3 Hz, 2H); <sup>13</sup>C NMR (CDCl<sub>3</sub>, 100 MHz): δ 192.9 (d, *J* = 5.9 Hz), 137.0, 133.7, 132.2 (d, *J* = 2.9 Hz), 131.8 (d, *J* = 103.4 Hz), 131.1 (d, *J* = 9.5 Hz), 129.3, 128.7 (d, *J* = 11.7 Hz), 128.6, 43.3 (d, *J* = 58.0 Hz); <sup>31</sup>P NMR (CDCl<sub>3</sub>, 162MHz): δ 27.0.

HRMS (ESI) calcd. for C<sub>20</sub>H<sub>18</sub>O<sub>2</sub>P (M+H)<sup>+</sup>: 321.1039, found: 321.1045.

### 2-(diphenylphosphoryl)-1-(p-tolyl)ethan-1-one (**3b**)<sup>2</sup>

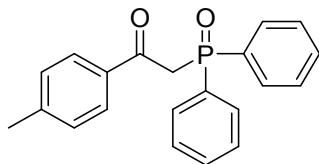

White solid; mp. 144.2-146.3 °C. <sup>1</sup>H NMR (CDCl<sub>3</sub>, 400 MHz): δ 7.88 (d, *J* = 8.3 Hz, 2H), 7.83-7.77 (m, 4H), 7.53-7.49 (m, 2H), 7.47-7.42 (m, 4H), 7.21 (d, *J* = 8.1 Hz, 2H), 4.11 (d, *J* = 15.4 Hz, 2H), 2.37 (s, 3H); <sup>13</sup>C NMR (CDCl<sub>3</sub>, 400 MHz): δ 192.4 (d, *J* = 5.1 Hz), 144.7, 134.5, 132.1 (d, *J* = 2.9 Hz), 132.0 (d, *J* = 103.4 Hz), 131.2 (d, *J* = 9.5 Hz), 129.4, 129.3, 128.6 (d, *J* = 11.7 Hz), 43.2 (d, *J* = 58.0 Hz), 21.7; <sup>31</sup>P NMR (CDCl<sub>3</sub>, 162 MHz): δ 27.1.

HRMS (ESI) calcd. for C<sub>21</sub>H<sub>20</sub>O<sub>2</sub>P (M+H)<sup>+</sup>: 335.1195, found: 335.1195.

### 2-(diphenylphosphoryl)-1-(4-methoxyphenyl)ethan-1-one (**3c**)<sup>2</sup>

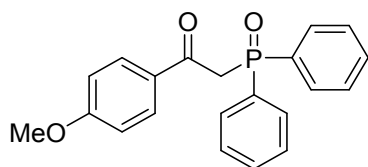

White solid; mp. 154.5-156.3 °C.  $^1\text{H}$  NMR ( $\text{CDCl}_3$ , 400 MHz):  $\delta$  7.99-7.97 (m, 2H), 7.82-7.77 (m, 4H), 7.53-7.49 (m, 2H), 7.47-7.42 (m, 4H), 6.89-6.87 (m, 2H), 4.08 (d,  $J = 15.4$  Hz, 2H), 3.84 (s, 3H);  $^{13}\text{C}$  NMR ( $\text{CDCl}_3$ , 100 MHz):  $\delta$  191.1 (d,  $J = 5.1$  Hz), 164.0, 132.1 (d,  $J = 2.9$  Hz), 132.0 (d,  $J = 102.7$  Hz), 131.8, 131.1 (d,  $J = 10.3$  Hz), 130.1, 128.6 (d,  $J = 11.7$  Hz), 113.7, 55.5, 43.2 (d,  $J = 58.0$  Hz);  $^{31}\text{P}$  NMR ( $\text{CDCl}_3$ , 162 MHz):  $\delta$  27.1  
HRMS (ESI) calcd. for  $\text{C}_{21}\text{H}_{20}\text{O}_3\text{P}$  ( $\text{M}+\text{H}$ ) $^+$ : 351.1145, found: 351.1145.

### 2-(diphenylphosphoryl)-1-(4-fluorophenyl)ethan-1-one (3d)<sup>2</sup>

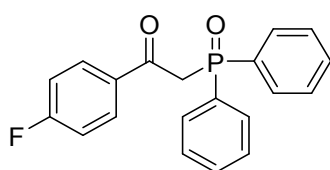

White solid; mp. 167.4-168.7 °C.  $^1\text{H}$  NMR ( $\text{CDCl}_3$ , 400 MHz):  $\delta$  8.06-8.02 (m, 2H), 7.82-7.76 (m, 4H), 7.55-7.51 (m, 2H), 7.49-7.44 (m, 4H), 7.10-7.06 (m, 2H), 4.10 (d,  $J = 15.2$  Hz, 2H);  $^{13}\text{C}$  NMR ( $\text{CDCl}_3$ , 100 MHz):  $\delta$  191.3 (d,  $J = 5.9$  Hz), 166.1 (d,  $J = 256.0$  Hz), 133.4 (d,  $J = 2.9$  Hz), 132.3 (d,  $J = 2.9$  Hz), 132.2 (d,  $J = 9.5$  Hz), 131.7 (d,  $J = 103.4$  Hz), 131.1 (d,  $J = 10.3$  Hz), 128.7 (d,  $J = 12.5$  Hz), 115.7 (d,  $J = 22.0$  Hz), 43.6 (d,  $J = 57.2$  Hz);  $^{31}\text{P}$  NMR ( $\text{CDCl}_3$ , 162 MHz):  $\delta$  26.8;  $^{19}\text{F}$  NMR (376 MHz,  $\text{CDCl}_3$ )  $\delta$  -104.1.  
HRMS (ESI) calcd. for  $\text{C}_{20}\text{H}_{17}\text{FO}_2\text{P}$  ( $\text{M}+\text{H}$ ) $^+$ : 339.0945, found: 339.0945.

### 1-(4-chlorophenyl)-2-(diphenylphosphoryl)ethan-1-one (3e)<sup>2</sup>

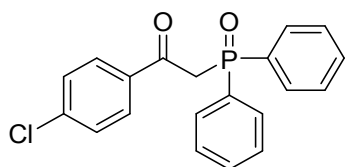

White solid; mp. 146.6-148.1 °C.  $^1\text{H}$  NMR ( $\text{CDCl}_3$ , 400 MHz):  $\delta$  7.98-7.95 (m, 2H), 7.82-7.77 (m, 4H), 7.56-7.52 (m, 2H), 7.50-7.45 (m, 4H), 7.41-7.38 (m, 2H), 4.11 (d,  $J = 15.3$  Hz, 2H);  $^{13}\text{C}$  NMR ( $\text{CDCl}_3$ , 100 MHz):  $\delta$  191.7 (d,  $J = 5.1$  Hz), 140.3, 135.3, 132.3 (d,  $J = 2.9$  Hz), 131.7 (d,  $J = 103.4$  Hz), 131.1 (d,  $J = 9.5$  Hz), 130.8, 128.9, 128.7 (d,  $J = 12.5$  Hz), 43.6 (d,  $J = 56.5$  Hz);  $^{31}\text{P}$  NMR ( $\text{CDCl}_3$ , 162 MHz):  $\delta$  26.8.  
HRMS (ESI) calcd. for  $\text{C}_{20}\text{H}_{17}\text{ClO}_2\text{P}$  ( $\text{M}+\text{H}$ ) $^+$ : 355.0649, found: 355.0650.

### 1-(4-bromophenyl)-2-(diphenylphosphoryl)ethan-1-one (3f)<sup>2</sup>

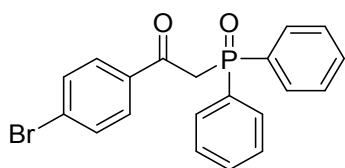

White solid; mp. 142.5-143.8 °C.  $^1\text{H}$  NMR ( $\text{CDCl}_3$ , 400 MHz):  $\delta$  7.89-7.87 (m, 2H), 7.82-7.76 (m, 4H), 7.58-7.52 (m, 4H), 7.50-7.45 (m, 4H), 4.10 (d,  $J = 15.2$  Hz, 2H);  $^{13}\text{C}$  NMR ( $\text{CDCl}_3$ , 100 MHz):  $\delta$  191.9 (d,  $J = 5.9$  Hz), 135.7, 132.3 (d,  $J = 2.9$  Hz), 132.2,

131.4 (d,  $J = 100.5$  Hz), 131.1 (d,  $J = 9.5$  Hz), 129.2, 128.7 (d,  $J = 11.7$  Hz), 43.6 (d,  $J = 56.5$  Hz);  $^{31}\text{P}$  NMR ( $\text{CDCl}_3$ , 162 MHz):  $\delta$  26.8.

HRMS (ESI) calcd. for  $\text{C}_{20}\text{H}_{17}\text{BrO}_2\text{P}$  ( $\text{M}+\text{H}$ ) $^+$ : 399.0144, found: 399.0145.

### 2-(diphenylphosphoryl)-1-(4-(trifluoromethyl)phenyl)ethan-1-one (3g)<sup>2</sup>

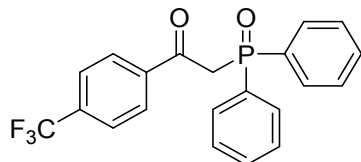

White solid; mp. 138.6-140.1 °C.  $^1\text{H}$  NMR ( $\text{CDCl}_3$ , 400 MHz):  $\delta$

8.12 (d,  $J = 8.2$  Hz, 2H), 7.81-7.76 (m, 4H), 7.68 (d,  $J = 8.3$  Hz, 2H), 7.56-7.52 (m, 2H), 7.50-7.45 (m, 4H), 4.16 (d,  $J = 15.2$  Hz, 2H);  $^{13}\text{C}$  NMR ( $\text{CDCl}_3$ , 100 MHz):  $\delta$  192.1 (d,  $J = 5.9$  Hz), 139.5, 134.7 (d,  $J = 33.0$  Hz), 132.4 (d,  $J = 2.9$  Hz), 132.0, 131.1 (d,  $J = 9.5$  Hz), 129.7, 128.7 (d,  $J = 12.5$  Hz), 125.6 (q,  $J = 3.7$  Hz), 123.5 (d,  $J = 272.9$  Hz), 43.9 (d,  $J = 55.8$  Hz);  $^{31}\text{P}$  NMR ( $\text{CDCl}_3$ , 162 MHz):  $\delta$  26.7.  $^{19}\text{F}$  NMR (376 MHz,  $\text{CDCl}_3$ )  $\delta$  -63.2.

HRMS (ESI) calcd. for  $\text{C}_{21}\text{H}_{17}\text{F}_3\text{O}_2\text{P}$  ( $\text{M}+\text{H}$ ) $^+$ : 389.0913, found: 389.0911.

### 2-(diphenylphosphoryl)-1-(m-tolyl)ethan-1-one (3i)<sup>2</sup>

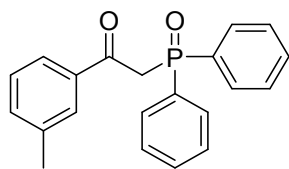

White solid; mp. 122.8-124.3 °C.  $^1\text{H}$  NMR ( $\text{CDCl}_3$ , 400 MHz):  $\delta$  7.83-

7.78 (m, 5H), 7.73 (s, 1H), 7.55-7.50 (m, 2H), 7.48-7.43 (m, 4H), 7.36-7.28 (m, 2H), 4.14 (d,  $J = 15.5$  Hz, 2H), 2.26 (s, 3H);  $^{13}\text{C}$  NMR ( $\text{CDCl}_3$ , 100 MHz):  $\delta$  193.0 (d,  $J = 5.9$  Hz), 138.3, 137.0, 134.5, 132.5 (d,  $J = 103.4$  Hz), 132.2 (d,  $J = 2.9$  Hz), 131.1 (d,  $J = 9.5$  Hz), 129.6, 128.6 (d,  $J = 11.7$  Hz), 128.5, 126.6, 43.2 (d,  $J = 58.0$  Hz), 21.3;  $^{31}\text{P}$  NMR ( $\text{CDCl}_3$ , 162 MHz):  $\delta$  27.1

HRMS (ESI) calcd. for  $\text{C}_{21}\text{H}_{20}\text{O}_2\text{P}$  ( $\text{M}+\text{H}$ ) $^+$ : 335.1195, found: 335.1194.

### 2-(diphenylphosphoryl)-1-(3-methoxyphenyl)ethan-1-one (3j)<sup>2</sup>

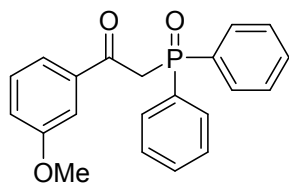

White solid; mp. 100.7-102.6 °C.  $^1\text{H}$  NMR (400 MHz,  $\text{CDCl}_3$ )  $\delta$  7.82-

7.77 (m, 4H), 7.59 (d,  $J = 7.7$  Hz, 1H), 7.54 - 7.50 (m, 2H), 7.47-7.43 (m, 5H), 7.32 (t,  $J = 7.9$  Hz, 1H), 7.08 (dd,  $J_1 = 2.1$  Hz,  $J_2 = 8.2$  Hz, 1H), 4.13 (d,  $J = 15.3$  Hz, 2H), 3.80 (s, 3H).  $^{13}\text{C}$  NMR ( $\text{CDCl}_3$ , 100 MHz):  $\delta$  192.7 (d,  $J = 5.1$  Hz), 159.7, 138.3, 132.2 (d,  $J = 2.9$  Hz), 131.9 (d,  $J = 103.4$  Hz), 131.2 (d,  $J = 10.3$  Hz), 129.6, 128.7 (d,  $J = 12.3$  Hz), 122.3, 120.6, 112.7, 55.5, 43.4 (d,  $J = 58.7$  Hz).  $^{31}\text{P}$  NMR ( $\text{CDCl}_3$ , 162 MHz):  $\delta$  27.1

HRMS (ESI) calcd. for  $\text{C}_{21}\text{H}_{20}\text{O}_3\text{P}$  ( $\text{M}+\text{H}$ ) $^+$ : 351.1145, found: 351.1145.

### 2-(diphenylphosphoryl)-1-(3-fluorophenyl)ethan-1-one (3k)<sup>2</sup>



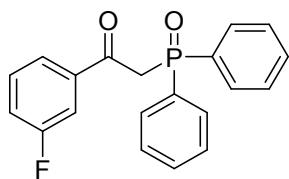

White solid; mp. 130.2-132.5 °C.  $^1\text{H}$  NMR (400 MHz,  $\text{CDCl}_3$ )  $\delta$  7.83-7.77 (m, 5H), 7.64-7.61 (m, 1H), 7.55-7.51 (m, 2H), 7.48-7.42 (m, 4H), 7.40-7.37 (m, 1H), 7.25-7.20 (m, 1H), 4.11 (d,  $J = 15.3$  Hz, 2H).  $^{13}\text{C}$  NMR ( $\text{CDCl}_3$ , 100 MHz):  $\delta$  191.7 (dd,  $J_1 = 2.2$  Hz,  $J_2 = 5.1$  Hz), 162.7 (d,  $J = 248.0$  Hz), 139.0 (d,  $J = 5.9$  Hz), 132.3 (d,  $J = 2.9$  Hz), 132.2 (d,  $J = 104.2$  Hz), 131.1 (d,  $J = 9.5$  Hz), 130.3 (d,  $J = 8.1$  Hz), 128.7 (d,  $J = 11.7$  Hz), 125.4 (d,  $J = 2.9$  Hz), 120.7 (d,  $J = 21.3$  Hz), 115.7 (d,  $J = 22.7$  Hz), 43.6 (d,  $J = 57.2$  Hz);  $^{31}\text{P}$  NMR ( $\text{CDCl}_3$ , 162 MHz):  $\delta$  26.7.  $^{19}\text{F}$  NMR (376 MHz,  $\text{CDCl}_3$ )  $\delta$  -111.8. HRMS (ESI) calcd. for  $\text{C}_{20}\text{H}_{17}\text{FO}_2\text{P}$  ( $\text{M}+\text{H}$ ) $^+$ : 339.0945, found: 339.0945.

### 1-(3-bromophenyl)-2-(diphenylphosphoryl)ethan-1-one (3l)<sup>2</sup>

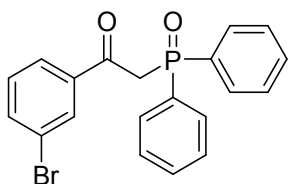

White solid; mp. 120.1-122.7 °C.  $^1\text{H}$  NMR ( $\text{CDCl}_3$ , 400 MHz):  $\delta$  8.02 (s, 1H), 7.96 (d,  $J = 7.8$  Hz, 1H), 7.81-7.76 (m, 4H), 7.64 (d,  $J = 7.8$  Hz, 1H), 7.55-7.51 (m, 2H), 7.48-7.44 (m, 4H), 7.29 (t,  $J = 8.0$  Hz, 1H), 4.11 (d,  $J = 15.2$  Hz, 2H);  $^{13}\text{C}$  NMR ( $\text{CDCl}_3$ , 100 MHz):  $\delta$  191.7 (d,  $J = 5.1$  Hz), 138.6, 136.4, 132.4 (d,  $J = 2.9$  Hz), 131.9, 131.6 (d,  $J = 104.2$  Hz), 131.1 (d,  $J = 9.5$  Hz), 130.2, 128.7 (d,  $J = 12.5$  Hz), 128.1, 122.9, 43.5 (d,  $J = 57.2$  Hz);  $^{31}\text{P}$  NMR ( $\text{CDCl}_3$ , 162 MHz):  $\delta$  26.7. HRMS (ESI) calcd. for  $\text{C}_{20}\text{H}_{17}\text{BrO}_2\text{P}$  ( $\text{M}+\text{H}$ ) $^+$ : 399.0144, found: 399.0140.

### 1-(3,4-difluorophenyl)-2-(diphenylphosphoryl)ethan-1-one (3m)

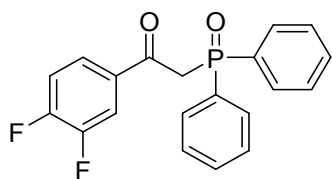

White solid; mp. 144.7-146.3 °C.  $^1\text{H}$  NMR (400 MHz,  $\text{CDCl}_3$ )  $\delta$  7.90-7.86 (m, 1H), 7.84-7.77 (m, 5H), 7.58-7.53 (m, 2H), 7.51-7.46 (m, 4H), 7.24-7.19 (m, 1H), 4.08 (d,  $J = 15.2$  Hz, 2H).  $^{13}\text{C}$  NMR ( $\text{CDCl}_3$ , 100 MHz):  $\delta$  190.5 (d,  $J = 4.4$  Hz), 154.0 (dd,  $J_1 = 13.2$ ,  $J_2 = 258.2$  Hz), 150.2 (dd,  $J_1 = 12.5$ ,  $J_2 = 250.9$  Hz), 134.0 (t,  $J = 3.7$  Hz), 132.4 (d,  $J = 2.9$  Hz), 132.0, 131.0 (d,  $J = 10.3$  Hz), 128.8 (d,  $J = 11.7$  Hz), 126.9 (q,  $J = 3.7$  Hz), 118.4 (dd,  $J_1 = 1.47$  Hz,  $J_2 = 18.3$  Hz), 117.5 (d,  $J = 17.6$  Hz), 43.7 (d,  $J = 56.5$  Hz).  $^{31}\text{P}$  NMR ( $\text{CDCl}_3$ , 162 MHz):  $\delta$  26.7.  $^{19}\text{F}$  NMR (376 MHz,  $\text{CDCl}_3$ )  $\delta$  -128.6 (d,  $J = 20.4$  Hz), -135.9 (d,  $J = 20.4$  Hz). HRMS (ESI) calcd. for  $\text{C}_{20}\text{H}_{16}\text{F}_2\text{O}_2\text{P}$  ( $\text{M}+\text{H}$ ) $^+$ : 357.0850, found: 357.0848.

### 2-(diphenylphosphoryl)-1-(o-tolyl)ethan-1-one (3n)<sup>2</sup>

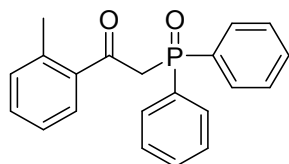

White solid; mp. 78.9-80.7 °C.  $^1\text{H}$  NMR ( $\text{CDCl}_3$ , 400 MHz):  $\delta$  7.86 (d,  $J = 8.5$  Hz, 1H), 7.81-7.76 (m, 4H), 7.55-7.51 (m, 2H), 7.48-7.44 (m, 4H), 7.36-7.32 (m, 1H), 7.24 (d,  $J = 7.3$  Hz, 1H), 7.14 (d,  $J = 7.5$  Hz, 1H), 4.10 (d,  $J = 15.3$  Hz, 2H), 2.30 (s, 3H);  $^{13}\text{C}$  NMR ( $\text{CDCl}_3$ , 100 MHz):  $\delta$  195.7 (d,  $J = 5.8$  Hz), 139.0, 137.8, 132.1 (d,  $J = 103.4$  Hz), 132.1 (d,  $J = 2.9$  Hz), 132.01, 131.9, 131.1 (d,  $J = 10.3$  Hz), 130.4, 128.7 (d,  $J = 12.5$  Hz), 125.8, 45.6 (d,  $J = 56.7$  Hz), 21.3;  $^{31}\text{P}$  NMR ( $\text{CDCl}_3$ , 162 MHz):  $\delta$  27.2.  
HRMS (ESI) calcd. for  $\text{C}_{21}\text{H}_{20}\text{O}_2\text{P}$  ( $\text{M}+\text{H}$ ) $^+$ : 335.1195, found: 335.1193.

### 1-(2-chlorophenyl)-2-(diphenylphosphoryl)ethan-1-one (3o)<sup>2</sup>

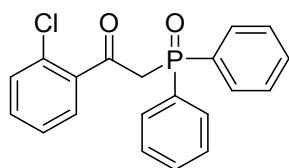

White solid; mp. 80.5-82.7 °C.  $^1\text{H}$  NMR ( $\text{CDCl}_3$ , 400 MHz):  $\delta$  8.02 (s, 1H), 7.96 (d,  $J = 7.8$  Hz, 1H), 7.79-7.74 (m, 4H), 7.55-7.51 (m,  $J = 7.8$  Hz, 2H), 7.48-7.43 (m, 4H), 7.35-7.29 (m, 2H), 7.26-7.22 (m, 1H), 4.24 (d,  $J = 14.8$  Hz, 2H);  $^{13}\text{C}$  NMR ( $\text{CDCl}_3$ , 100 MHz):  $\delta$  195.0 (d,  $J = 5.9$  Hz), 139.0, 132.2 (d,  $J = 2.9$  Hz), 131.8 (d,  $J = 103.4$  Hz), 131.1 (d,  $J = 10.3$  Hz), 131.0, 130.3, 130.1, 128.7 (d,  $J = 12.5$  Hz), 127.1, 47.7 (d,  $J = 58.0$  Hz);  $^{31}\text{P}$  NMR ( $\text{CDCl}_3$ , 162 MHz):  $\delta$  27.1  
HRMS (ESI) calcd. for  $\text{C}_{20}\text{H}_{17}\text{ClO}_2\text{P}$  ( $\text{M}+\text{H}$ ) $^+$ : 355.0649, found: 355.0648.

### 2-(di-p-tolylphosphoryl)-1-(4-fluorophenyl)ethan-1-one (3p)

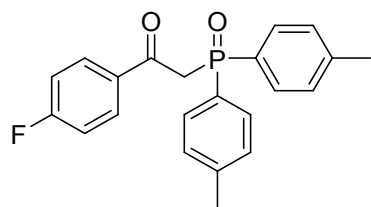

White solid; mp. 108.6-110.6 °C.  $^1\text{H}$  NMR ( $\text{CDCl}_3$ , 400 MHz):  $\delta$  8.08-8.04 (m, 2H), 7.68-7.63 (m, 4H), 7.28-7.25 (m, 4H), 7.09 (t,  $J = 8.6$  Hz, 2H), 4.07 (d,  $J = 15.3$  Hz, 2H), 2.38 (s, 6H);  $^{13}\text{C}$  NMR ( $\text{CDCl}_3$ , 100 MHz):  $\delta$  191.5 (d,  $J = 5.9$  Hz), 166.1 (d,  $J = 256.0$  Hz), 142.8 (d,  $J = 2.9$  Hz), 133.5 (d,  $J = 2.2$  Hz), 131.1 (d,  $J = 10.3$  Hz), 129.5, 129.3, 128.6 (d,  $J = 106.4$  Hz), 115.6 (d,  $J = 22.0$  Hz), 43.8 (d,  $J = 56.5$  Hz), 21.6;  $^{31}\text{P}$  NMR ( $\text{CDCl}_3$ , 162 MHz):  $\delta$  27.3.  $^{19}\text{F}$  NMR (376 MHz,  $\text{CDCl}_3$ )  $\delta$  -104.3.  
HRMS (ESI) calcd. for  $\text{C}_{22}\text{H}_{21}\text{FO}_2\text{P}$  ( $\text{M}+\text{H}$ ) $^+$ : 367.1258, found: 367.1256.

### 2-(di-p-tolylphosphoryl)-1-(3-fluorophenyl)ethan-1-one (3q)

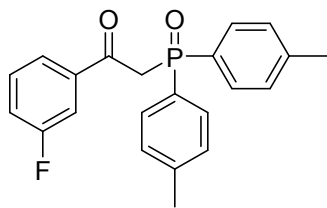

White solid; mp. 110.8.-112.3 °C.  $^1\text{H}$  NMR ( $\text{CDCl}_3$ , 400 MHz):  $\delta$  7.86-7.83 (m, 1H), 7.69-7.62 (m, 5H), 7.44-7.39 (m, 1H), 7.28-7.28 (m, 4H), 7.24-7.22 (m, 1H), 4.07 (d,  $J = 15.3$  Hz, 2H), 2.39 (s, 6H);  $^{13}\text{C}$  NMR ( $\text{CDCl}_3$ , 100 MHz):  $\delta$  192.0 (dd,  $J_1 = 2.2$ ,  $J_2 = 5.9$  Hz), 162.7 (d,  $J = 248.0$  Hz), 142.8 (d,  $J = 2.9$  Hz), 139.1 (d,  $J = 6.6$  Hz), 131.1 (d,  $J = 10.3$  Hz), 130.2 (d,  $J = 7.3$  Hz), 129.4 (d,  $J = 12.5$  Hz), 128.6 (d,  $J = 106.4$  Hz), 125.5 (d,  $J = 2.9$  Hz), 120.6 (d,  $J = 21.3$ ), 115.7 (d,  $J = 22.7$  Hz), 43.9 (d,  $J = 56.5$  Hz), 21.6;  $^{31}\text{P}$  NMR ( $\text{CDCl}_3$ , 162 MHz):  $\delta$  27.3.  $^{19}\text{F}$  NMR (376 MHz,  $\text{CDCl}_3$ )  $\delta$  -111.9.  
HRMS (ESI) calcd. for  $\text{C}_{22}\text{H}_{21}\text{FO}_2\text{P}$  ( $\text{M}+\text{H}$ ) $^+$ : 367.1258, found: 367.1254.

### 2-(bis(3,5-dimethylphenyl)phosphoryl)-1-(3-fluorophenyl)ethan-1-one (3r)

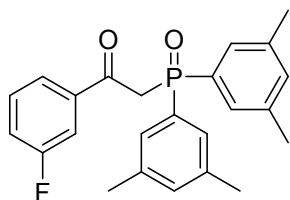

White solid; mp. 100.5.-102.3 °C.  $^1\text{H}$  NMR ( $\text{CDCl}_3$ , 400 MHz):  $\delta$  7.82 (d,  $J = 7.8$  Hz 1H), 7.64-7.60 (m, 1H), 7.43-7.36 (m, 5H), 7.25-7.22 (m, 1H), 7.14 (s, 1H), 4.07 (d,  $J = 15.2$  Hz, 2H), 2.32 (s, 12H);  $^{13}\text{C}$  NMR ( $\text{CDCl}_3$ , 100 MHz):  $\delta$  191.9 (dd,  $J_1 = 2.2$ ,  $J_2 = 5.14$  Hz), 162.7 (d,  $J = 248.9$  Hz), 139.2 (d,  $J = 5.9$  Hz), 138.5 (d,  $J = 13.2$  Hz), 134.0 (d,  $J = 2.9$  Hz), 131.5 (d,  $J = 102.7$  Hz), 130.2 (d,  $J = 7.34$  Hz), 128.6 (d,  $J = 9.54$  Hz), 125.4 (d,  $J = 2.2$  Hz), 120.5 (d,  $J = 21.3$ ), 115.7 (d,  $J = 22.0$  Hz), 43.7 (d,  $J = 55.8$  Hz), 21.3;  $^{31}\text{P}$  NMR ( $\text{CDCl}_3$ , 162 MHz):  $\delta$  27.3.  $^{19}\text{F}$  NMR (376 MHz,  $\text{CDCl}_3$ )  $\delta$  -112.0.  
HRMS (ESI) calcd. for  $\text{C}_{24}\text{H}_{25}\text{FO}_2\text{P}$  ( $\text{M}+\text{H}$ ) $^+$ : 395.1571, found: 395.1571.

**7a.** FT-IR  $\nu$  (KBr,  $\text{cm}^{-1}$ ): 1675.67 (C=O), 1140.05 (P=O); anal. calcd for  $\text{Eu}(\text{C}_{20}\text{H}_{17}\text{O}_2\text{P})_2\text{Cl}_3(\text{H}_2\text{O})_{10}$ : C, 44.52; H, 5.04. Found: C, 44.53; H, 4.70.

**7b.** FT-IR  $\nu$  (KBr,  $\text{cm}^{-1}$ ): 1672.01 (C=O), 1139.6 (P=O); anal. calcd for  $\text{EuC}_{63}\text{H}_{57}\text{O}_6\text{P}_3\text{Cl}_3(\text{H}_2\text{O})_5$ : C 55.99; H 5.00. Found: C, 56.14; H, 4.77.

**7c.** FT-IR  $\nu$  (KBr,  $\text{cm}^{-1}$ ): 1666.08 (C=O), 1095.18 (P=O); anal. calcd for  $\text{EuC}_{63}\text{H}_{57}\text{O}_9\text{P}_3\text{Cl}_3(\text{H}_2\text{O})_6$ : C, 53.38; H, 4.59. Found: C, 52.95; H, 4.59.

**7d.** FT-IR  $\nu$  (KBr,  $\text{cm}^{-1}$ ): 1675.94 (C=O), 1158.48 (P=O); anal. calcd for  $\text{EuC}_{60}\text{H}_{48}\text{F}_3\text{O}_6\text{P}_3\text{Cl}_3(\text{H}_2\text{O})_6$ : C, 52.17; H, 4.38. Found: C, 52.17; H, 4.30.

**7e.** Yield: 58% (42 mg). FT-IR  $\nu$  (KBr,  $\text{cm}^{-1}$ ): 1677.02 (C=O), 1142.57 (P=O); anal. calcd for  $\text{EuC}_{40}\text{H}_{32}\text{Br}_3\text{O}_4\text{P}_2\text{Cl}_3(\text{H}_2\text{O})_3$ : C, 47.71; H, 4.00. Found C, 47.84; H, 3.55.

**7f.** FT-IR  $\nu$  (KBr,  $\text{cm}^{-1}$ ): 1674.69 (C=O), 1151.60 (P=O); anal. calcd for  $\text{EuC}_{63}\text{H}_{48}\text{F}_3\text{O}_6\text{P}_3\text{Cl}_3(\text{CH}_3\text{CN})_{13}(\text{H}_2\text{O})_5$ : C, 52.22; H, 4.78. Found: C, 52.55; H, 4.55.

**7g.** FT-IR  $\nu$  (KBr,  $\text{cm}^{-1}$ ): 1674.20 (C=O), 1139.90 (P=O); anal. calcd for  $\text{EuC}_{63}\text{H}_{57}\text{O}_6\text{P}_3\text{Cl}_3(\text{H}_2\text{O})_6$ : C, 55.25; H, 5.08. Found: C, 55.44; H, 4.75.

**7h.** FT-IR  $\nu$  (KBr,  $\text{cm}^{-1}$ ): 1675.23 (C=O), 1139.26 (P=O); anal. calcd for  $\text{EuC}_{63}\text{H}_{57}\text{O}_9\text{P}_3\text{Cl}_3(\text{H}_2\text{O})_5$ : C, 54.07; H, 4.83. Found: C, 54.36; H, 4.83.

**7i.** FT-IR  $\nu$  (KBr,  $\text{cm}^{-1}$ ): 1679.25 (C=O), 1137.68 (P=O); anal. calcd for  $\text{EuC}_{40}\text{H}_{32}\text{Br}_3\text{O}_4\text{P}_2\text{Cl}_3(\text{CH}_3\text{CN})_2(\text{H}_2\text{O})_5$ : C, 43.00; H, 3.94. Found: C, 43.27; H, 4.13.

**7j.** FT-IR  $\nu$  (KBr,  $\text{cm}^{-1}$ ): 1650.63 (C=O), 1155.67 (P=O); anal. calcd for  $\text{EuC}_{60}\text{H}_{45}\text{F}_6\text{O}_6\text{P}_3\text{Cl}_3(\text{H}_2\text{O})_6$ : C, 48.75; H, 3.95. Found: C, 48.72; H, 4.10.

**7k.** FT-IR  $\nu$  (KBr,  $\text{cm}^{-1}$ ): 1676.16 (C=O), 1137.41 (P=O); anal. calcd for  $\text{EuC}_{63}\text{H}_{57}\text{O}_6\text{P}_3\text{Cl}_3(\text{H}_2\text{O})_7$ : C, 54.54; H, 5.16. Found: C, 54.19; H, 4.73.

## References:

<sup>1</sup> Bai Y.; Chen W.; Chen Y.; Huang H.; Xiao F.; Deng G. *RSC Adv.*, **2015**, 5, 8002.

<sup>2</sup> Zhang, P.; Zhang, L.; Gao, Y.; Xu, J.; Fang, H.; Tang, G.; Zhao, Y. *Chem. Commun.*, **2015**, 51, 7839.

## 7. The NMR spectra

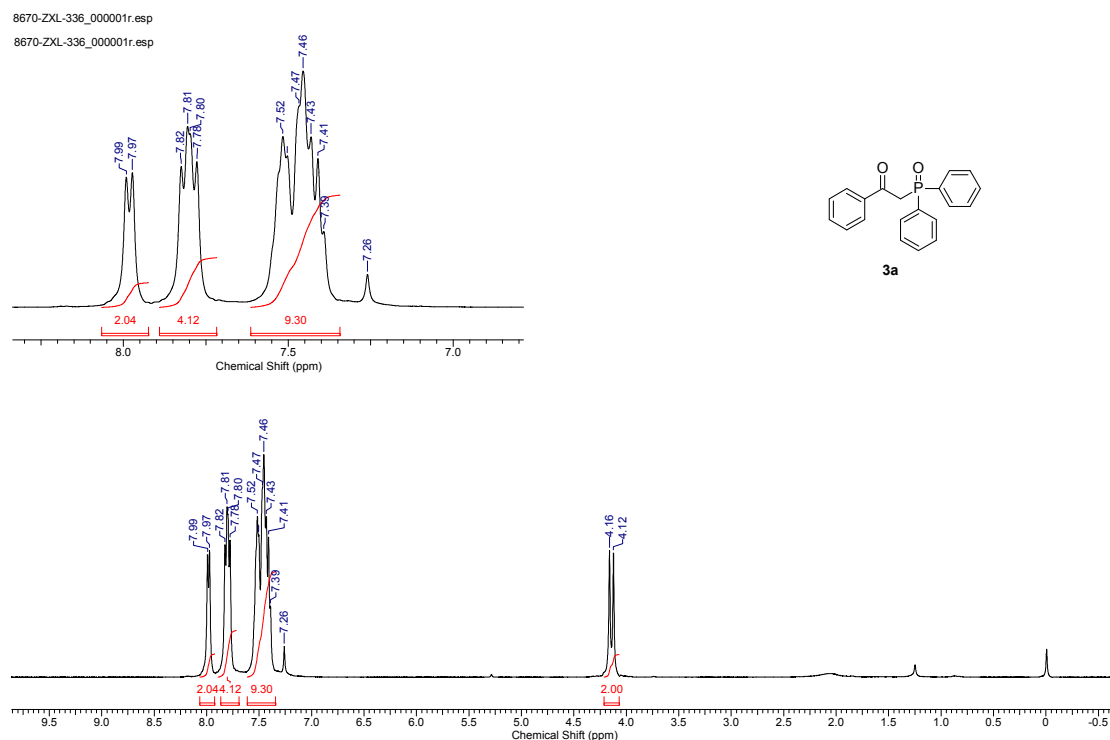

**Figure S18.**  $^1\text{H}$  NMR spectrum of compound **3a**

8672-ZXL-336\_000001r  
8672-ZXL-336\_000001r

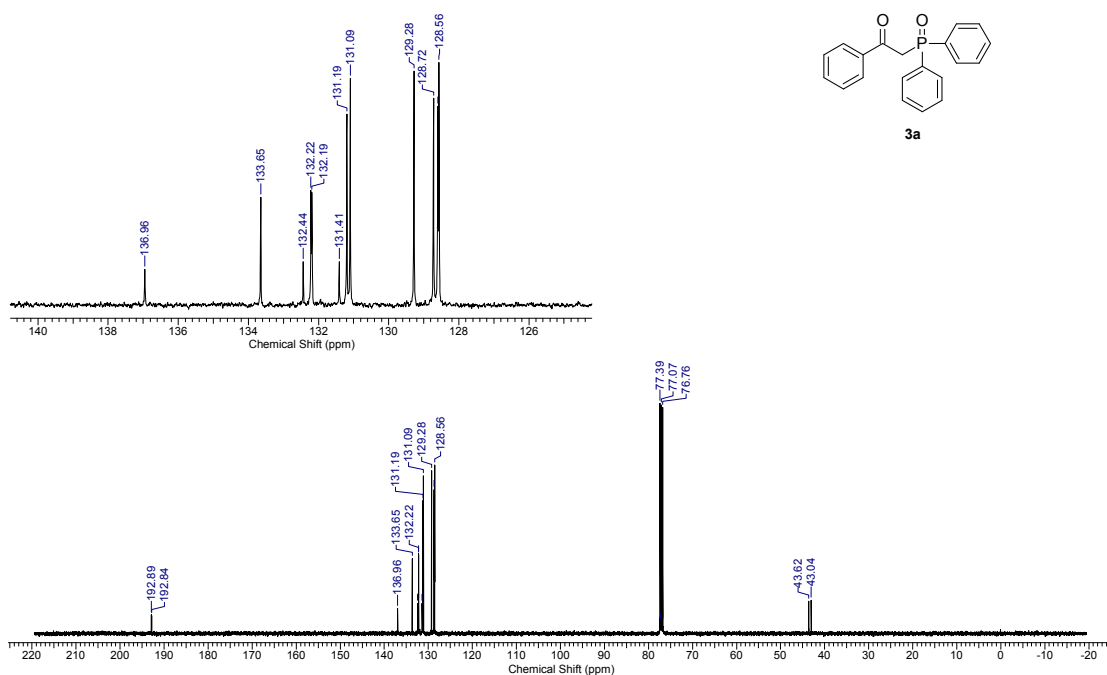

Figure S19. <sup>13</sup>C NMR spectrum of compound 3a

17-w-hmm-10.30-2\_8671001r

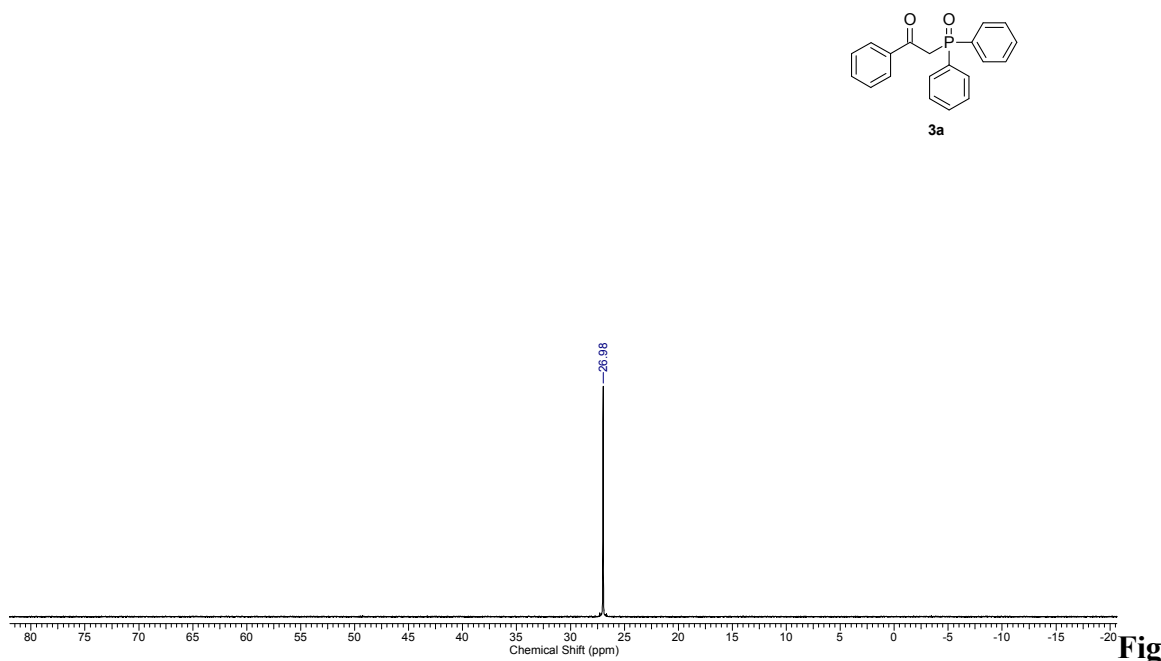

Figure S20. <sup>31</sup>P NMR spectrum of compound 3a

8240-zxl-330\_000001r.esp  
8240-zxl-330\_000001r.esp

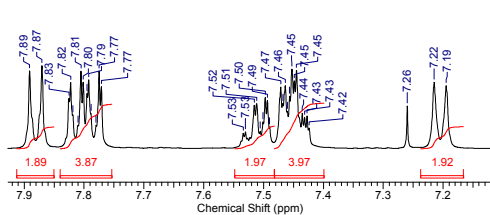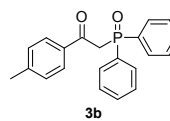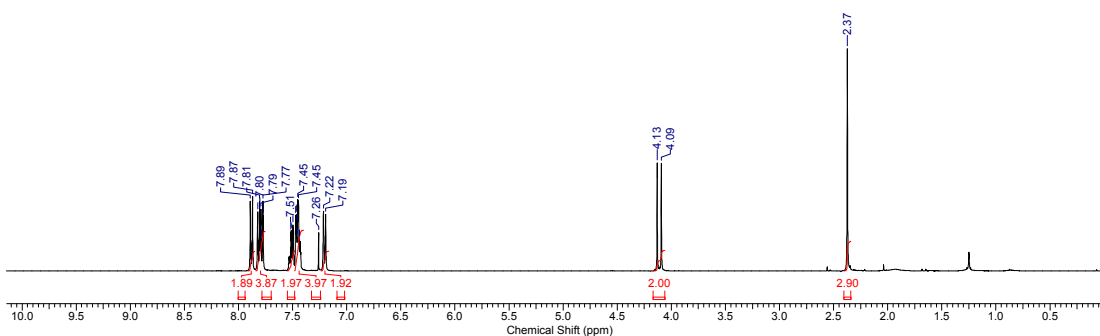

Figure S21. <sup>1</sup>H NMR spectrum of compound 3b

8242-ZXL-330-C\_000001r.esp  
8242-ZXL-330-C\_000001r.esp

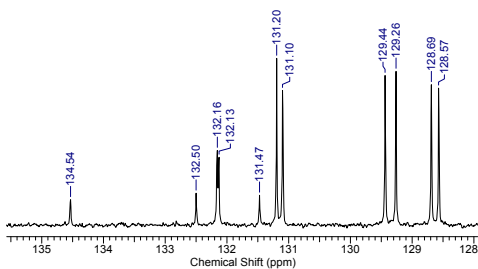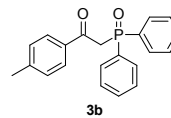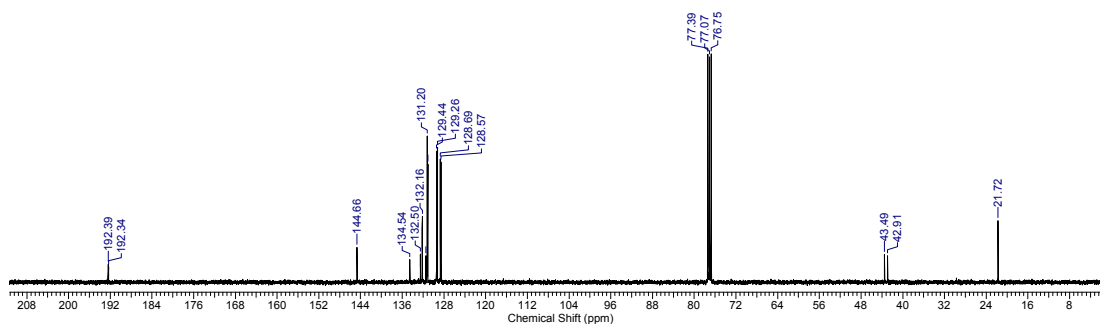

Figure S22. <sup>13</sup>C NMR spectrum of compound 3b

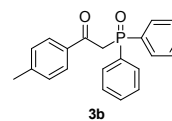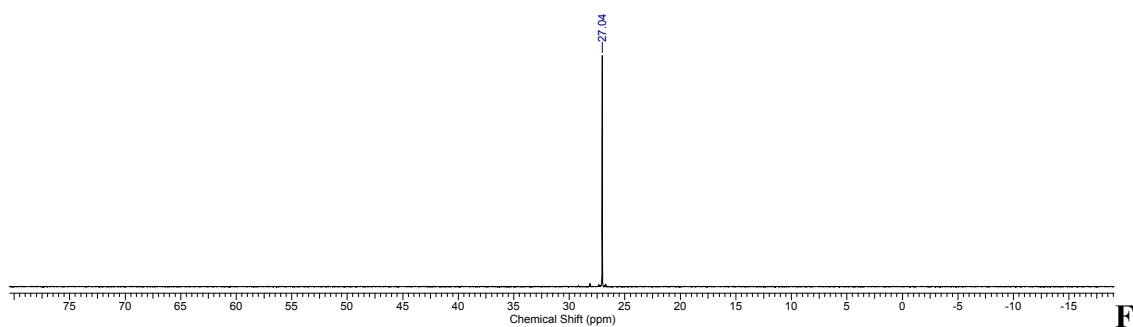

**figure S23.**  $^{31}\text{P}$  NMR spectrum of compound **3b**

8820-ZXL-352\_000001r  
8820-ZXL-352\_000001r

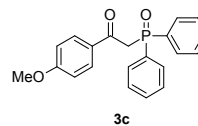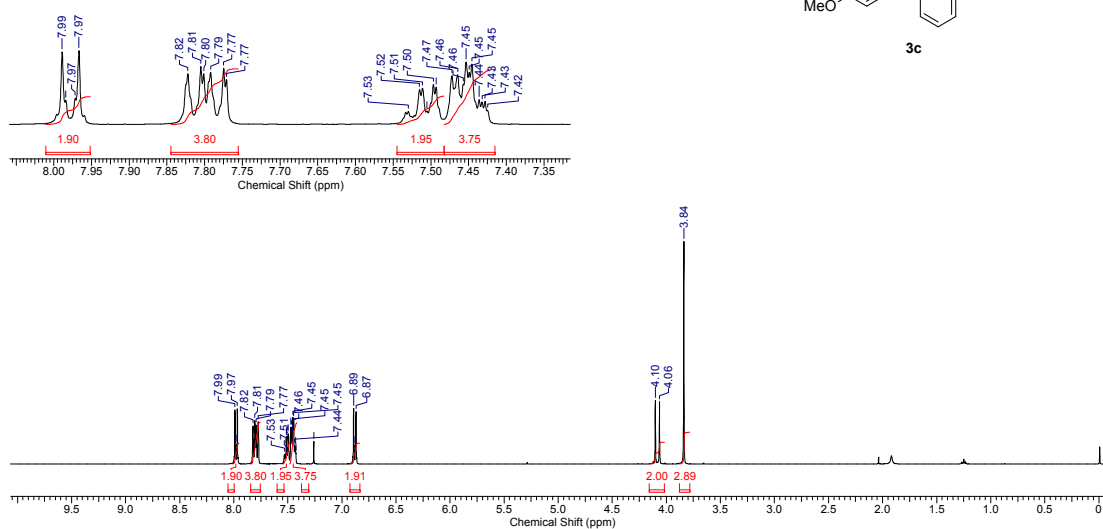

**Figure S24.**  $^1\text{H}$  NMR spectrum of compound **3c**

8822-ZXL-352\_000001r  
8822-ZXL-352\_000001r

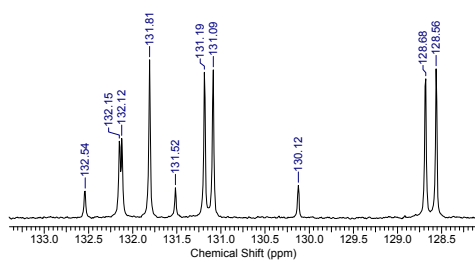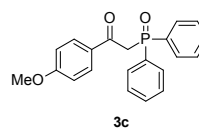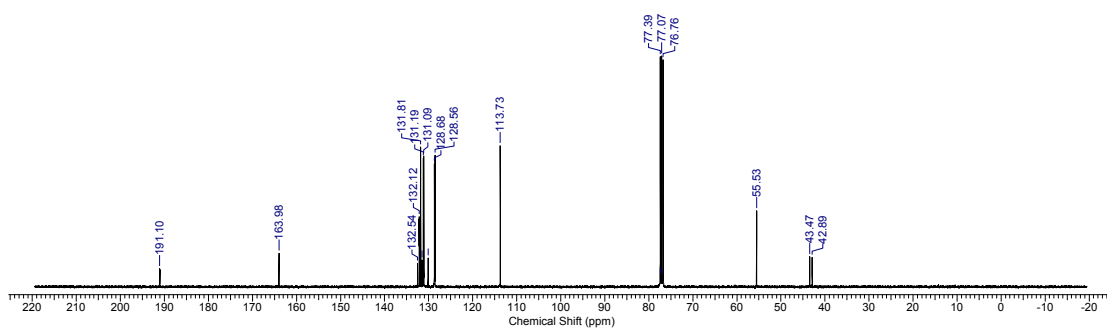

Figure S25. <sup>13</sup>C NMR spectrum of compound 3c

17-w-hmm-17.11.2\_8821001r

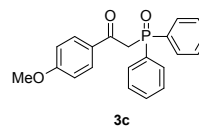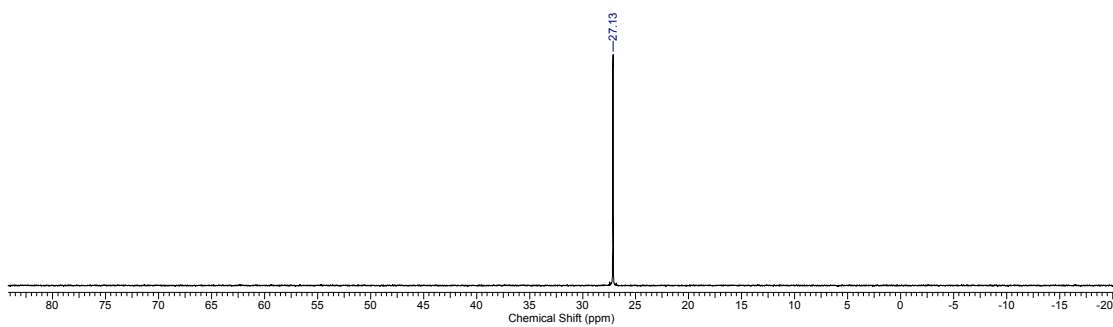

Figure S26. <sup>31</sup>P NMR spectrum of compound 3c



8800-ZXL-351\_000001r  
8800-ZXL-351\_000001r

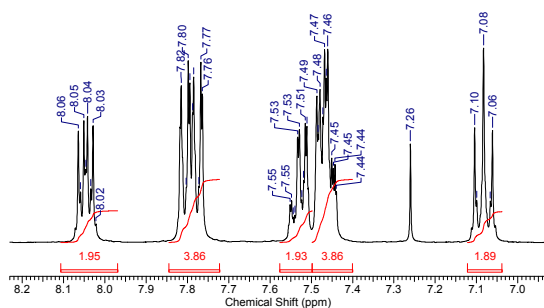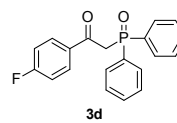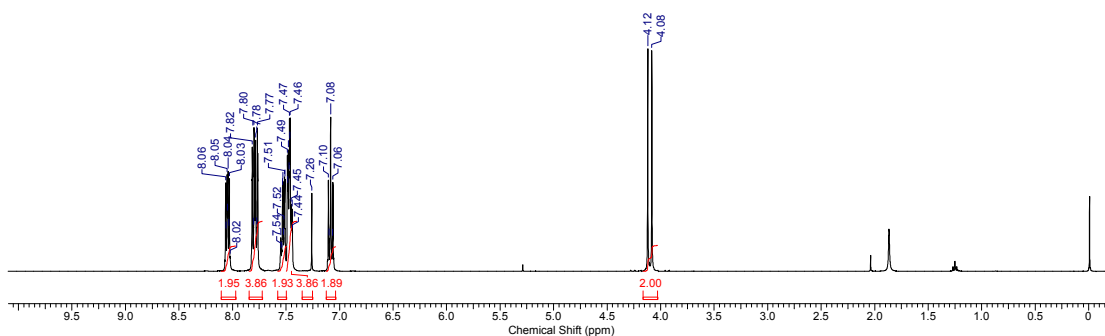

**Figure S27.**  $^1\text{H}$  NMR spectrum of compound **3d**

8803-ZXL-351\_000001r  
8803-ZXL-351\_000001r

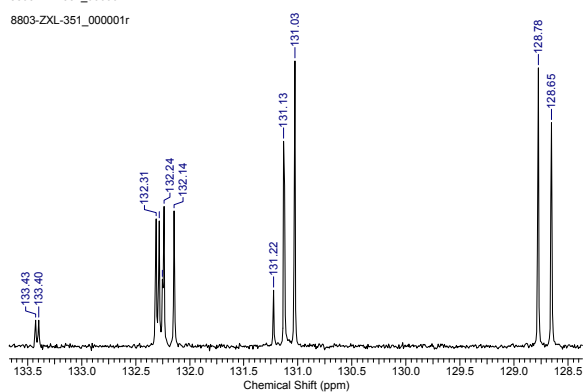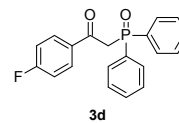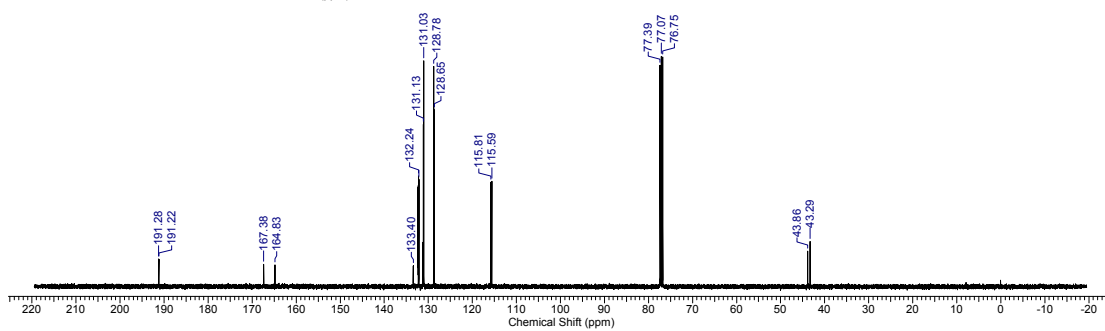

**Figure S28.**  $^{13}\text{C}$  NMR spectrum of compound **3d**

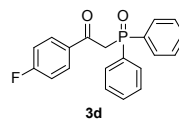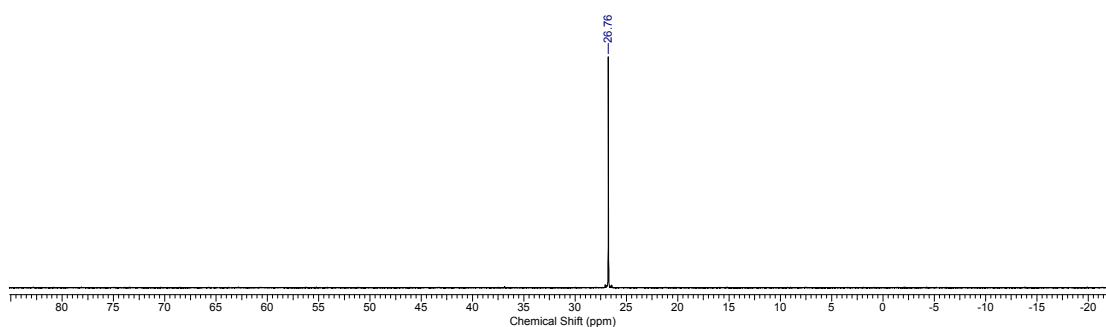

Figure S29.  $^{31}\text{P}$  NMR spectrum of compound **3d**

9750-ZXL-349\_000001r  
9750-ZXL-349\_000001r

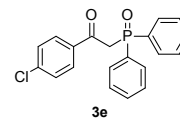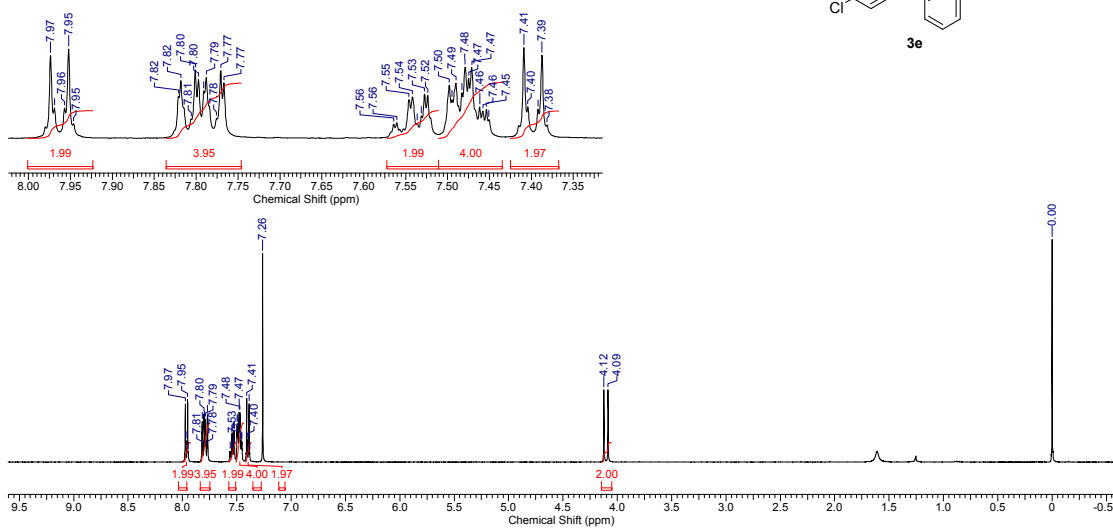

Figure S30.  $^1\text{H}$  NMR spectrum of compound **3e**

8782-ZXL-349\_000001r  
8782-ZXL-349\_000001r

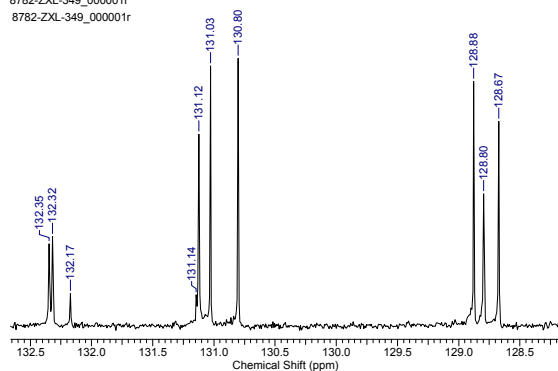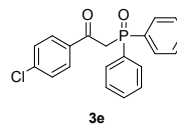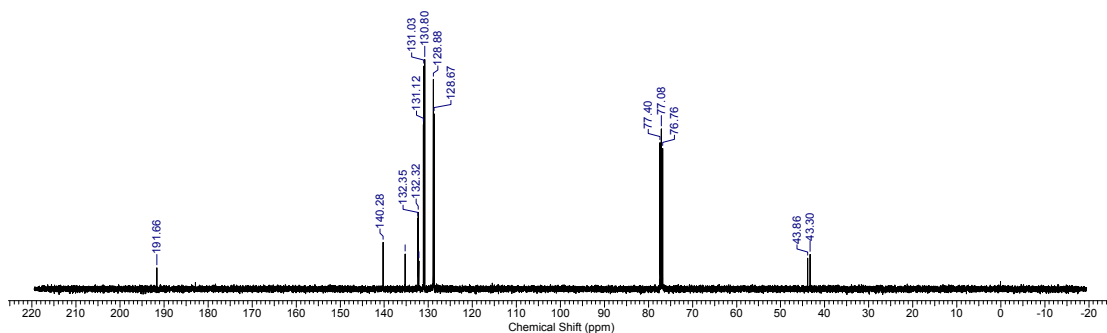

**Figure S31.** <sup>13</sup>C NMR spectrum of compound **3e**

17-w-hmm-17.11.2\_8781001r

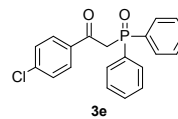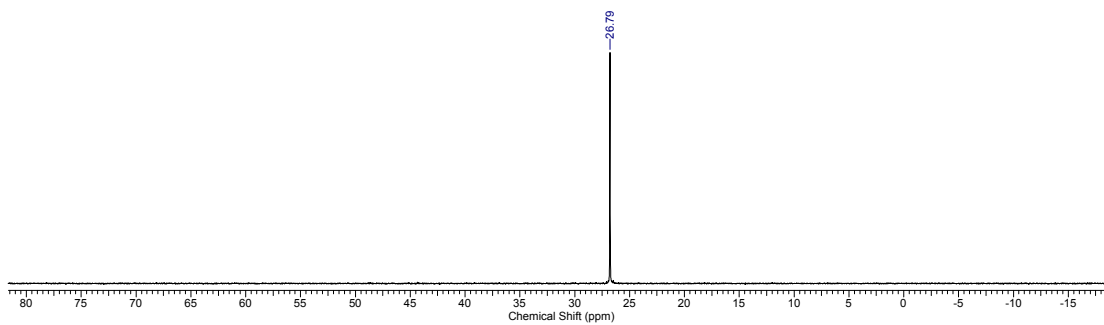

**Figure S32.** <sup>31</sup>P NMR spectrum of compound **3e**

9760-ZXL-297\_000001r  
9760-ZXL-297\_000001r

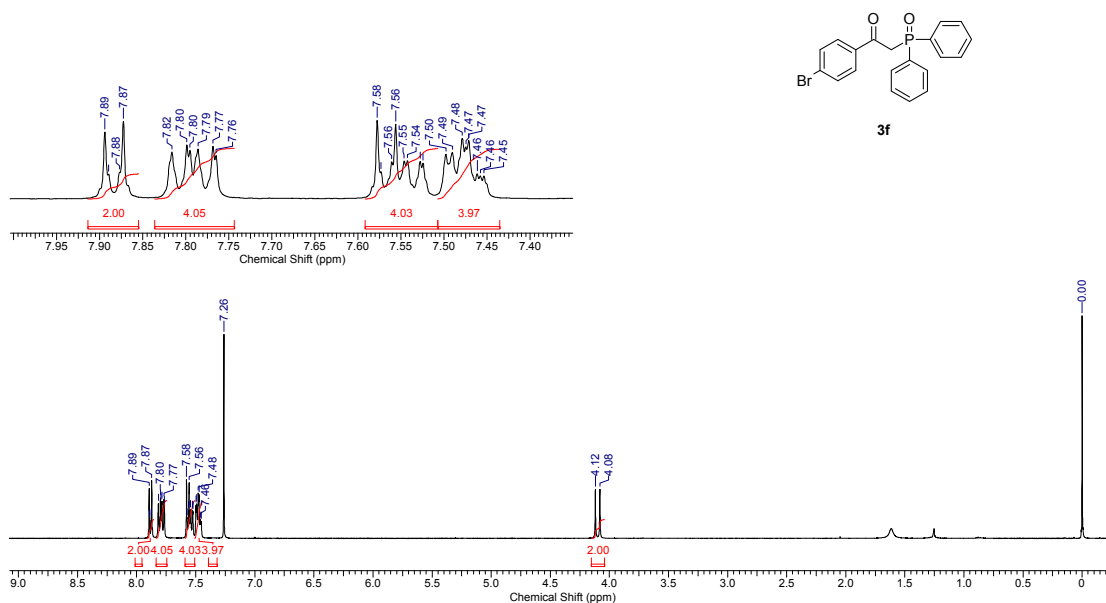

Figure S33. <sup>1</sup>H NMR spectrum of compound 3f

8772-ZXL-297\_000001r  
8772-ZXL-297\_000001r

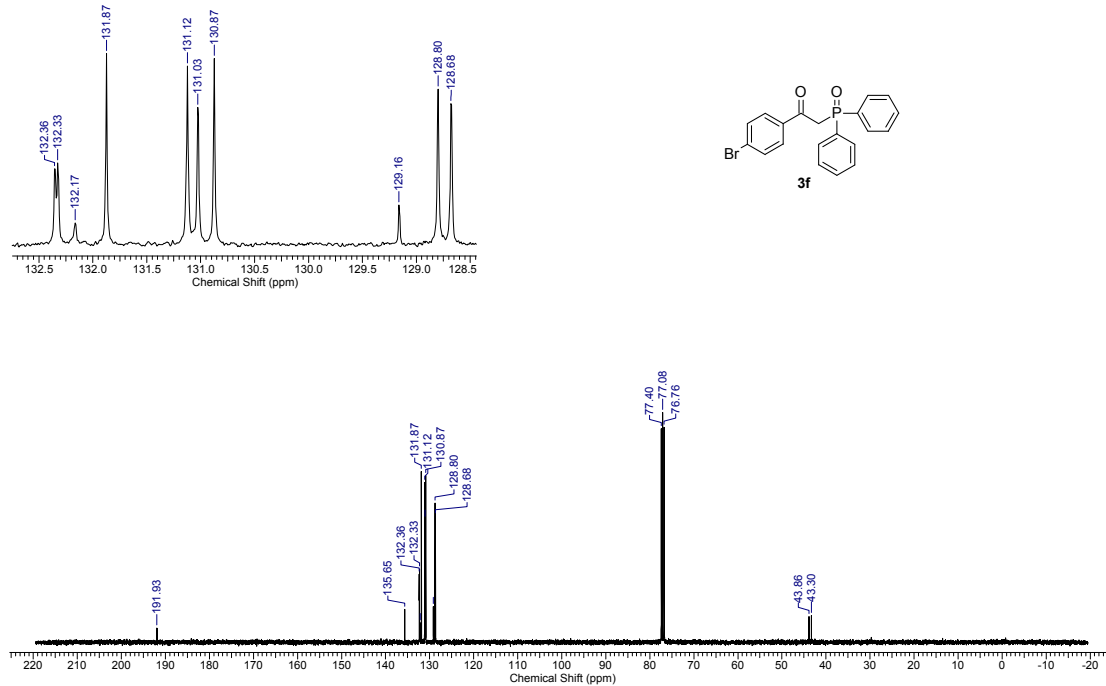

Figure S34. <sup>13</sup>C NMR spectrum of compound 3f

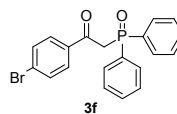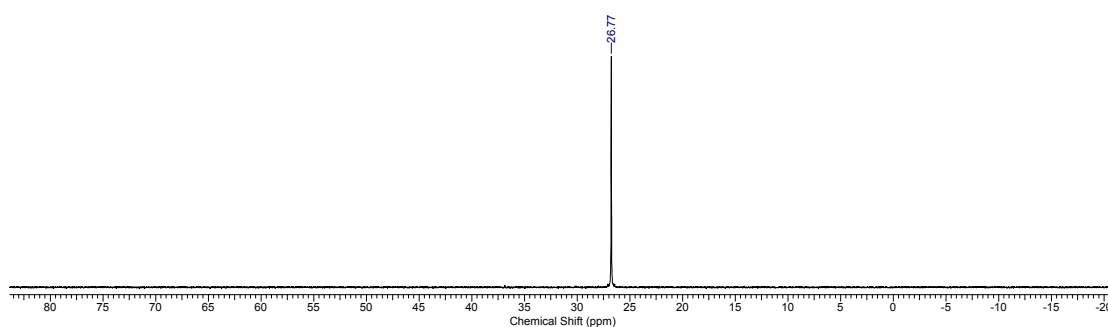

**Figure S35.**  $^{31}\text{P}$  NMR spectrum of compound **3f**

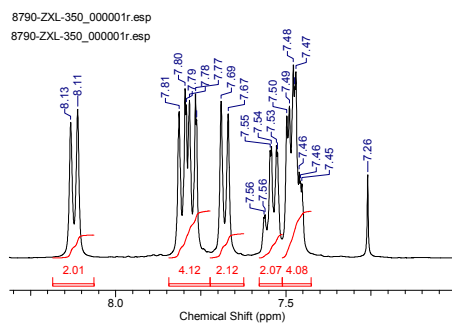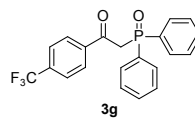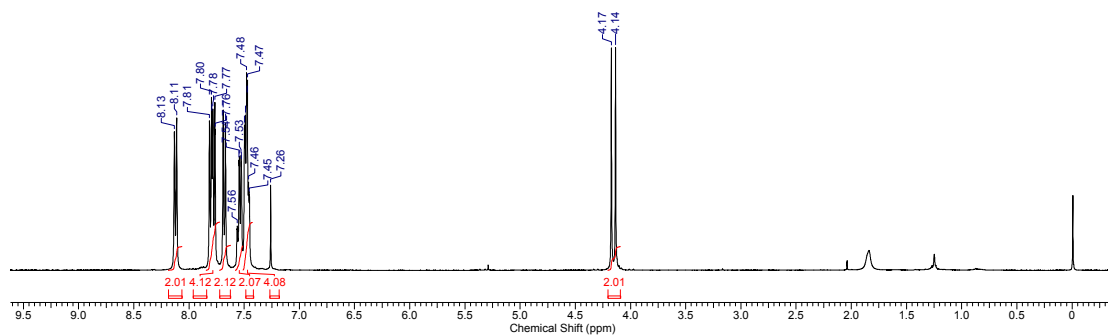

**Figure S36.**  $^1\text{H}$  NMR spectrum of compound **3g**

8790-ZXL-350-C\_000001r.esp  
8790-ZXL-350-C\_000001r.esp

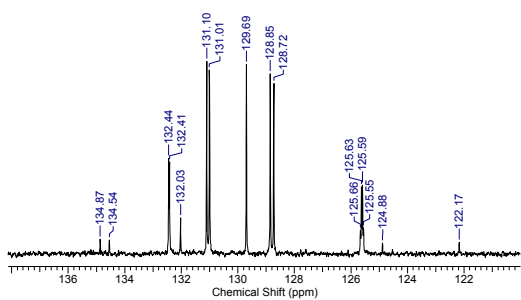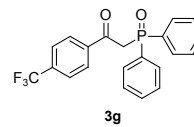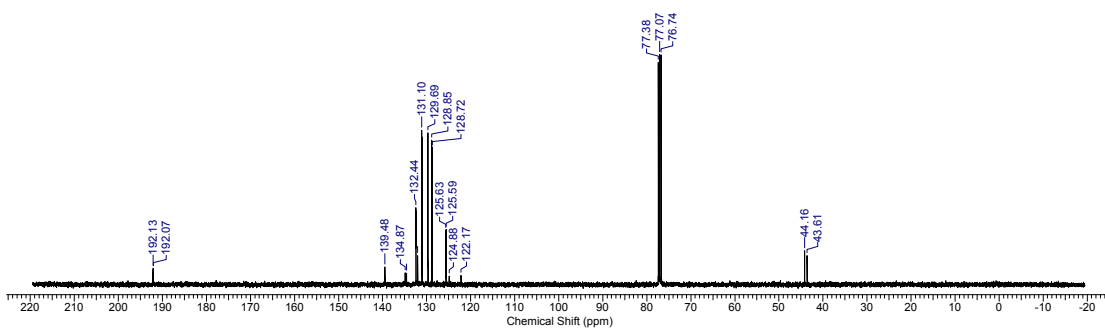

**Figure S37.** <sup>13</sup>C NMR spectrum of compound **3g**

17-w-hmm-17.11.2\_8791001r

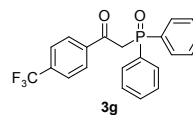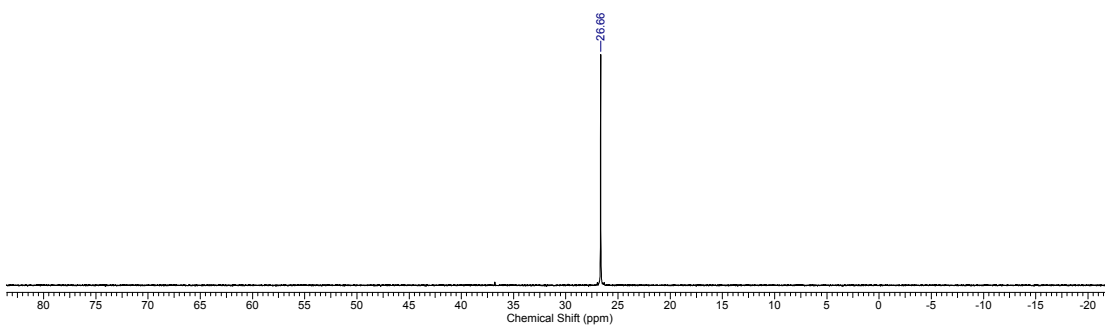

**Figure S38.** <sup>31</sup>P NMR spectrum of compound **3g**

8840-ZXL-366\_000001r.esp

8840-ZXL-366\_000001r.esp

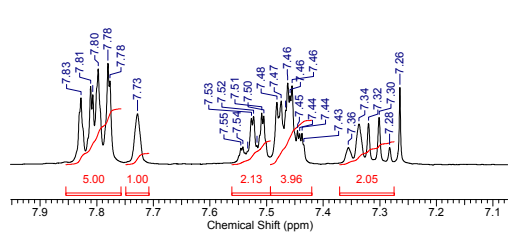

Figure S39. <sup>1</sup>H NMR spectrum of compound **3i**

8842-ZXL-352\_000001r

8842-ZXL-352\_000001r

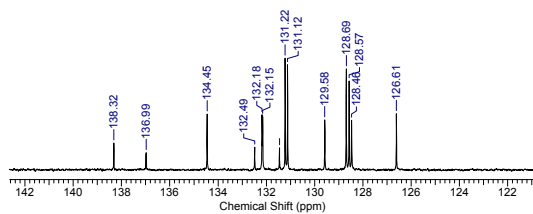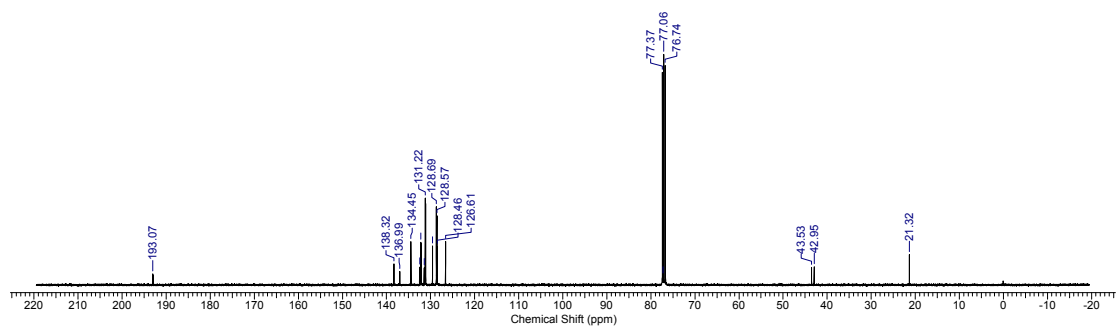

Figure S40. <sup>13</sup>C NMR spectrum of compound **3i**

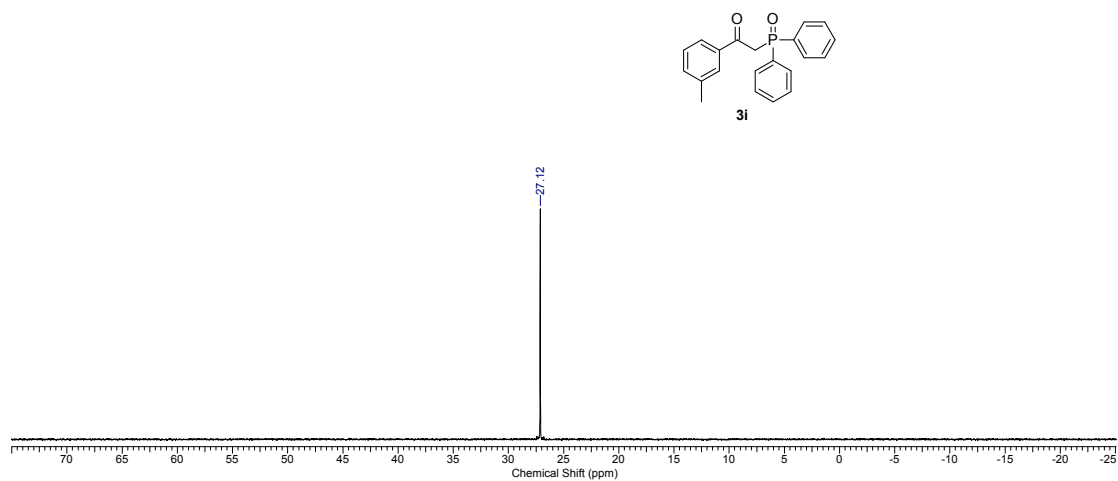Figure S41. <sup>31</sup>P NMR spectrum of compound **3i**8500-ZXL-357\_000001r.esp  
8500-ZXL-357\_000001r.esp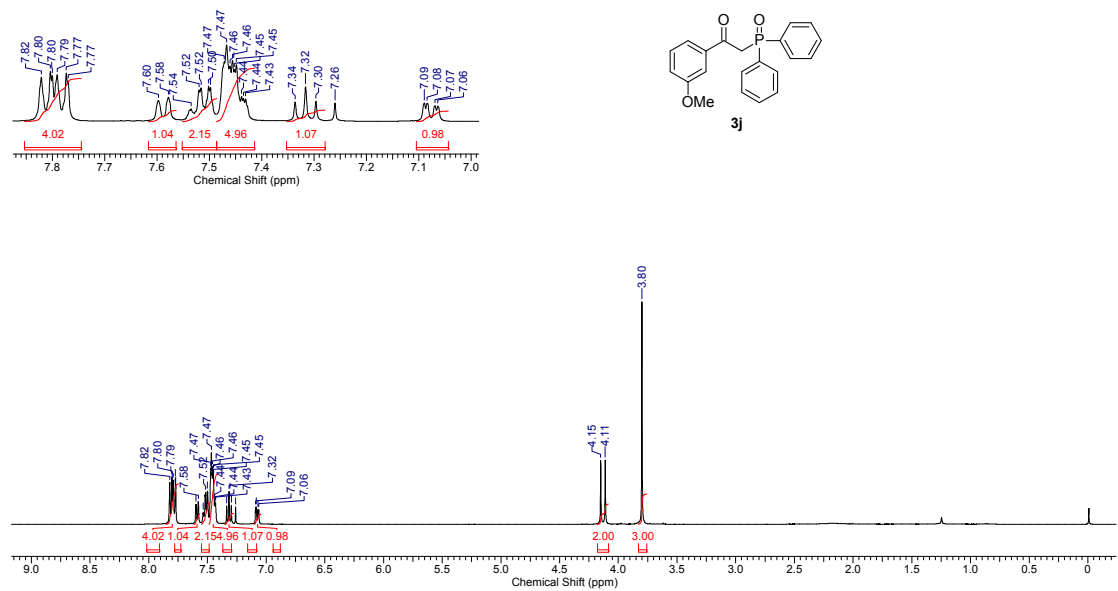Figure S42. <sup>1</sup>H NMR spectrum of compound **3j**



8502-ZXL-357-C\_000001r.esp

8502-ZXL-357-C\_000001r.esp

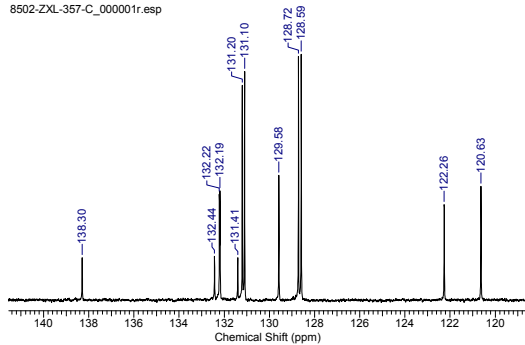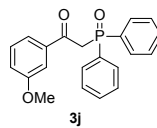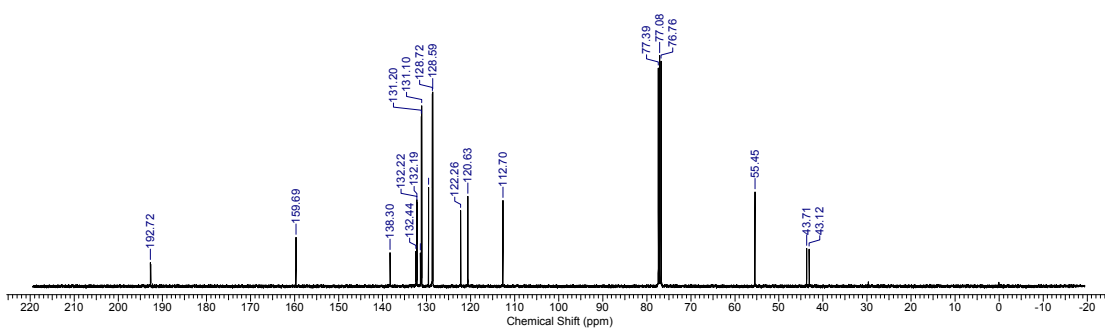

**Figure S43.** <sup>13</sup>C NMR spectrum of compound **3j**

17-w-hmm-10.25-2\_8501001r

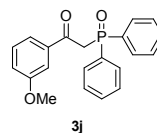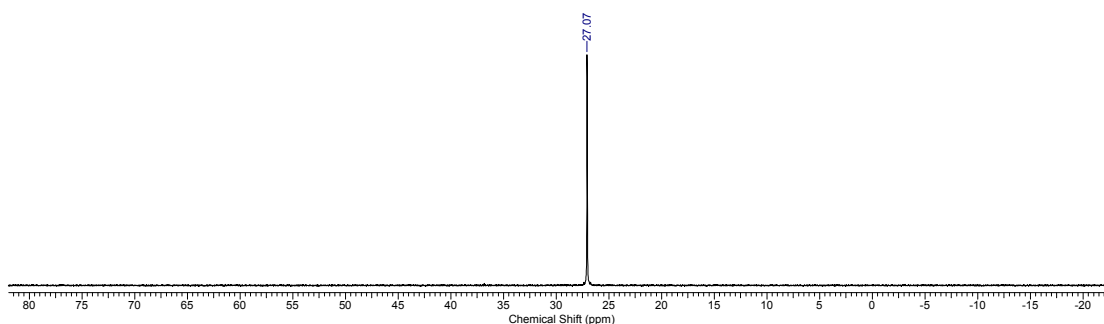

**Figure S44.** <sup>31</sup>P NMR spectrum of compound **3j**

8590-ZXL-353\_000001r.esp  
8590-ZXL-353\_000001r.esp

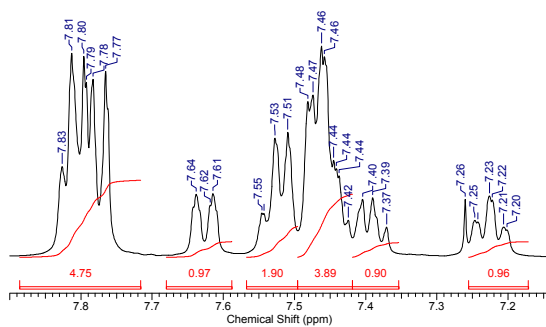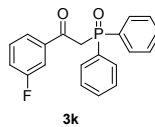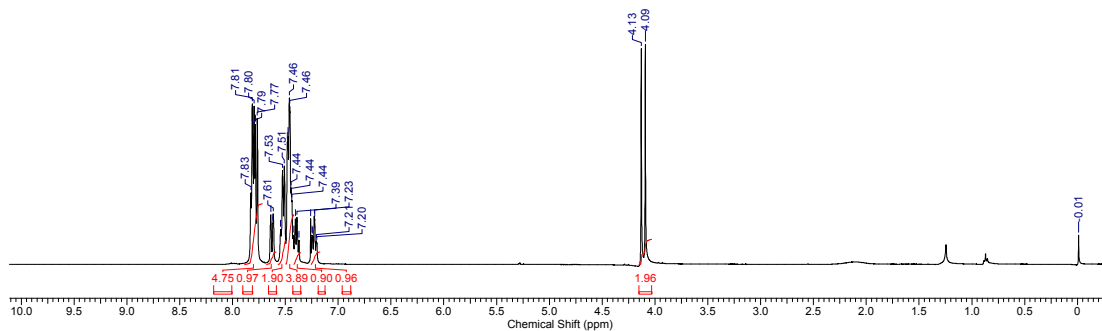

**Figure S45.** <sup>1</sup>H NMR spectrum of compound **3k**

8593-ZXL-353-C\_000001r.esp  
8593-ZXL-353-C\_000001r.esp

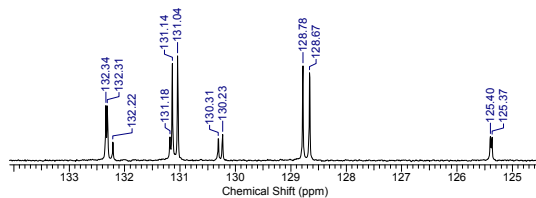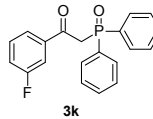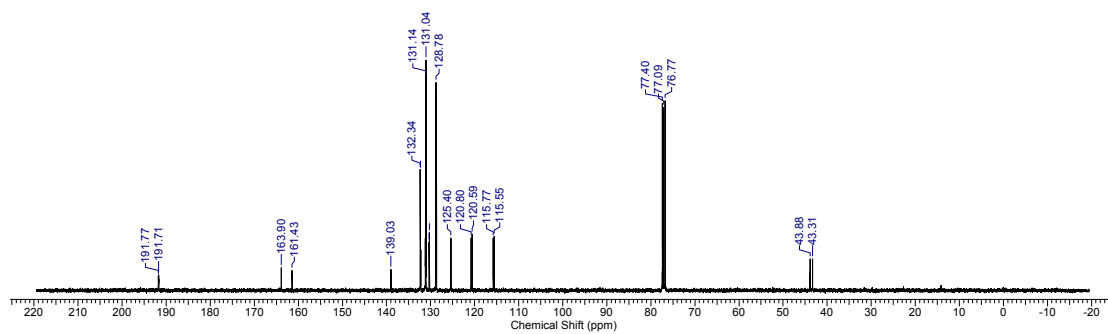

**Figure S46.** <sup>13</sup>C NMR spectrum of compound **3k**

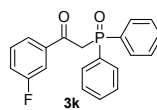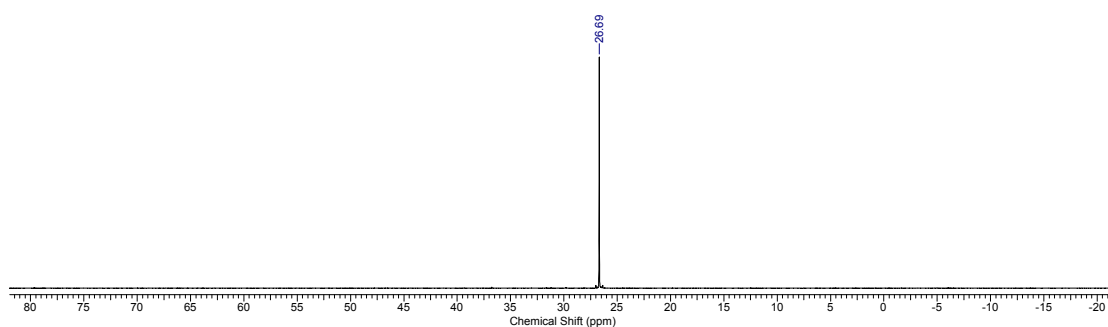

**Figure S47.**  $^{31}\text{P}$  NMR spectrum of compound **3k**

8510-ZXL-358\_000001r.esp  
8510-ZXL-358\_000001r.esp

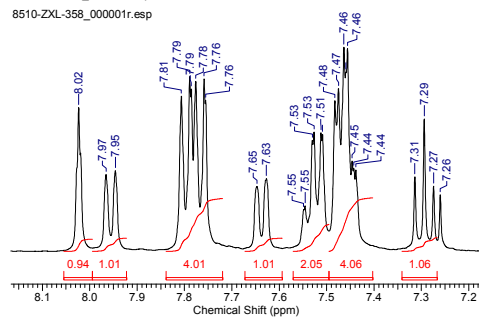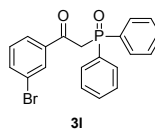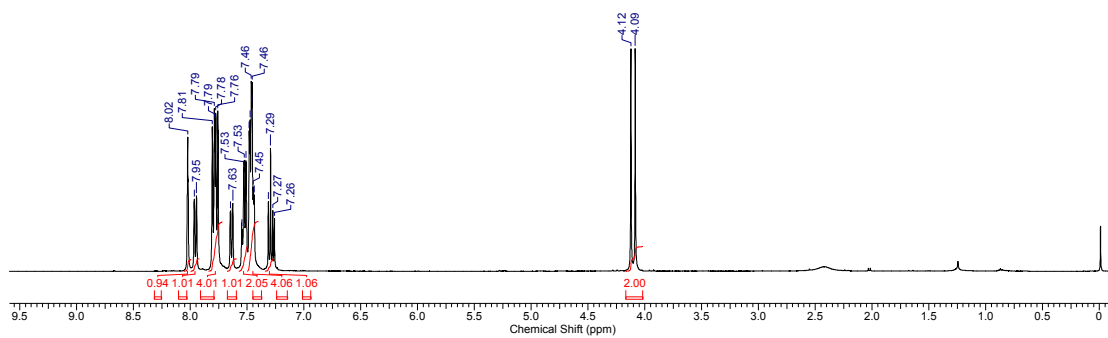

**Figure S48.**  $^1\text{H}$  NMR spectrum of compound **3l**

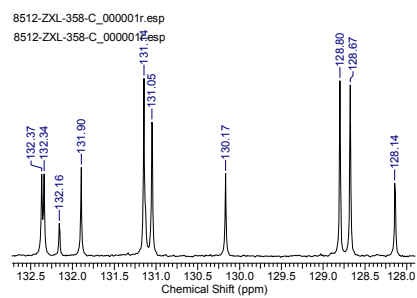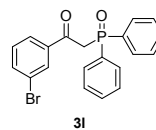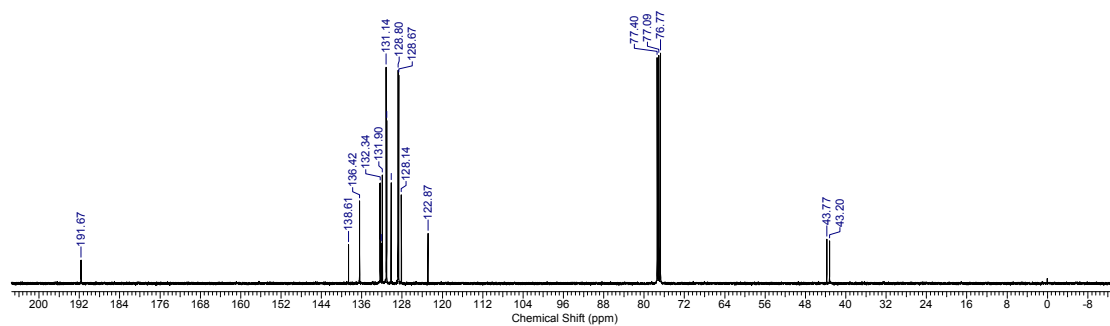

**Figure S49.**  $^{13}\text{C}$  NMR spectrum of compound **31**

8511-ZXL-358-P\_000001r.esp

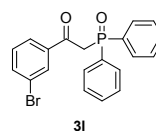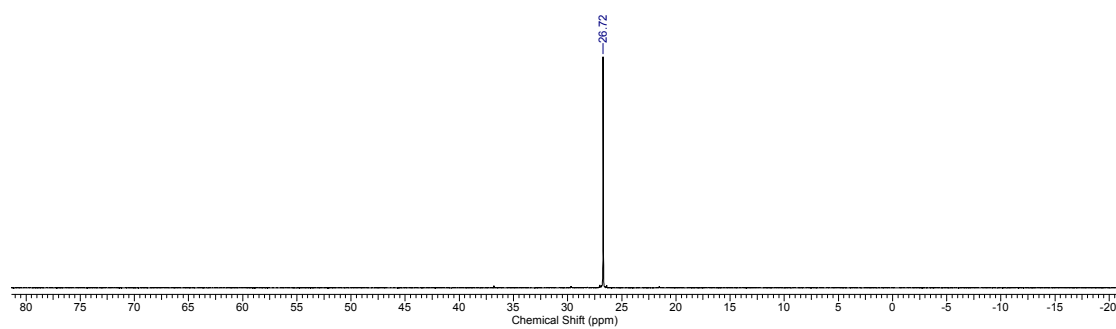

**Figure S50.**  $^{31}\text{P}$  NMR spectrum of compound **31**

9770-ZXL-354\_000001r  
9770-ZXL-354\_000001r

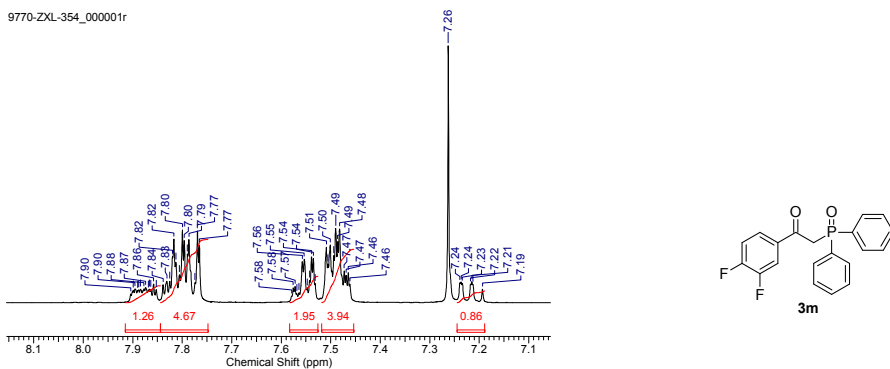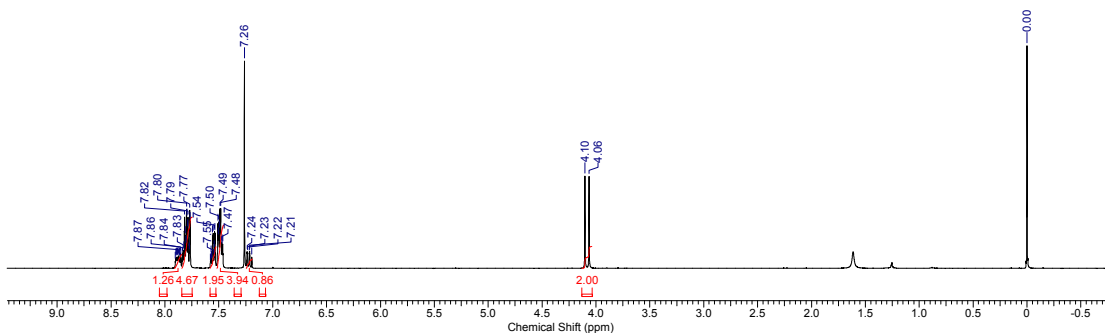

Figure S51. <sup>1</sup>H NMR spectrum of compound 3m

8600-ZXL-354-C\_000001r.esp  
8600-ZXL-354-C\_000001r.esp

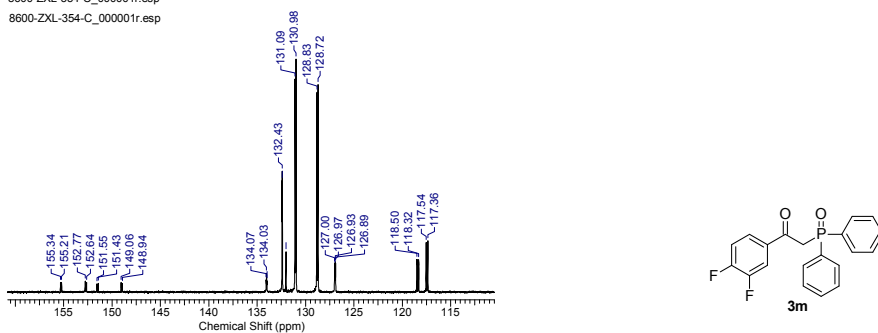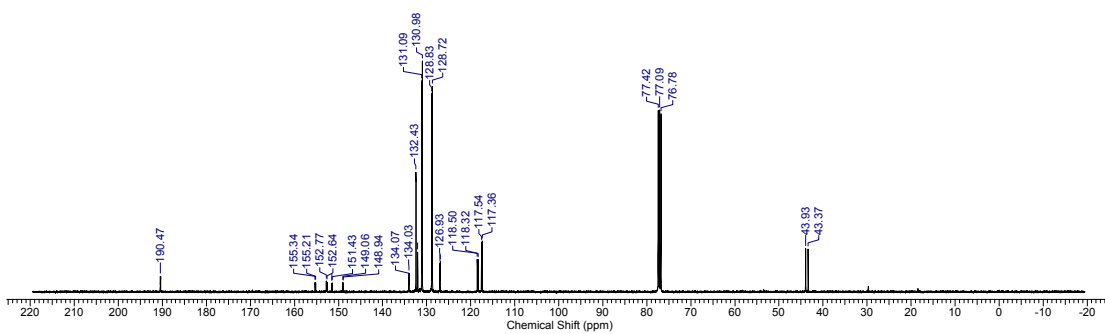

Figure S52. <sup>13</sup>C NMR spectrum of compound 3m

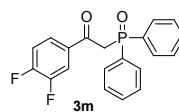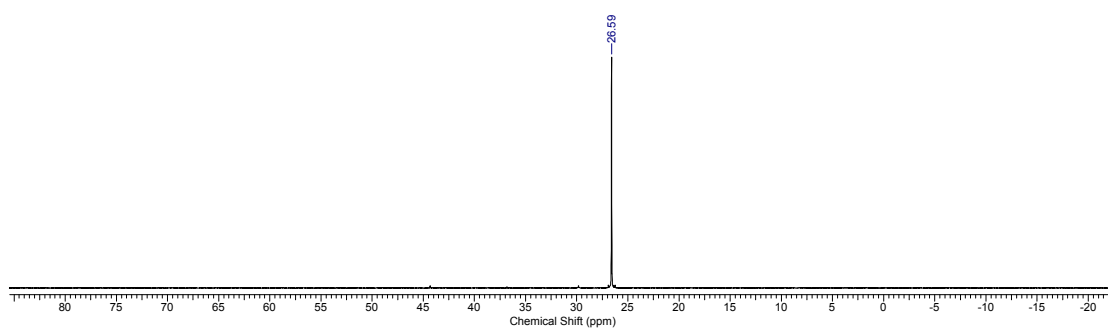

**Figure S53.**  $^{31}\text{P}$  NMR spectrum of compound **3m**

8330-ZXL-355\_000001r.esp

8330-ZXL-355\_000001r.esp

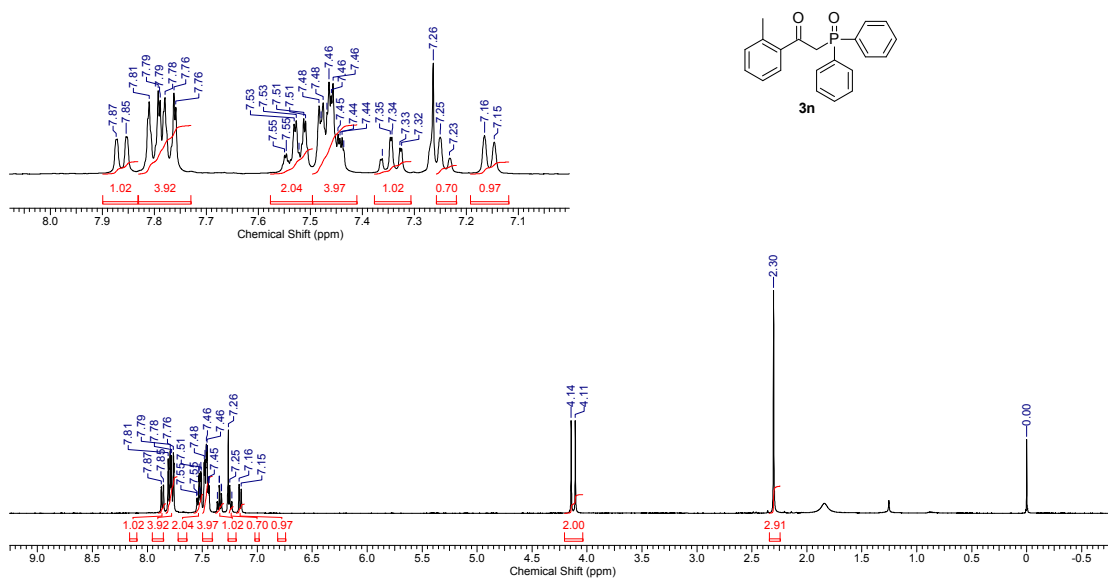

**Figure S54.**  $^1\text{H}$  NMR spectrum of compound **3n**

8332-ZXL-355-C\_000001r.esp  
8332-ZXL-355-C\_000001r.esp

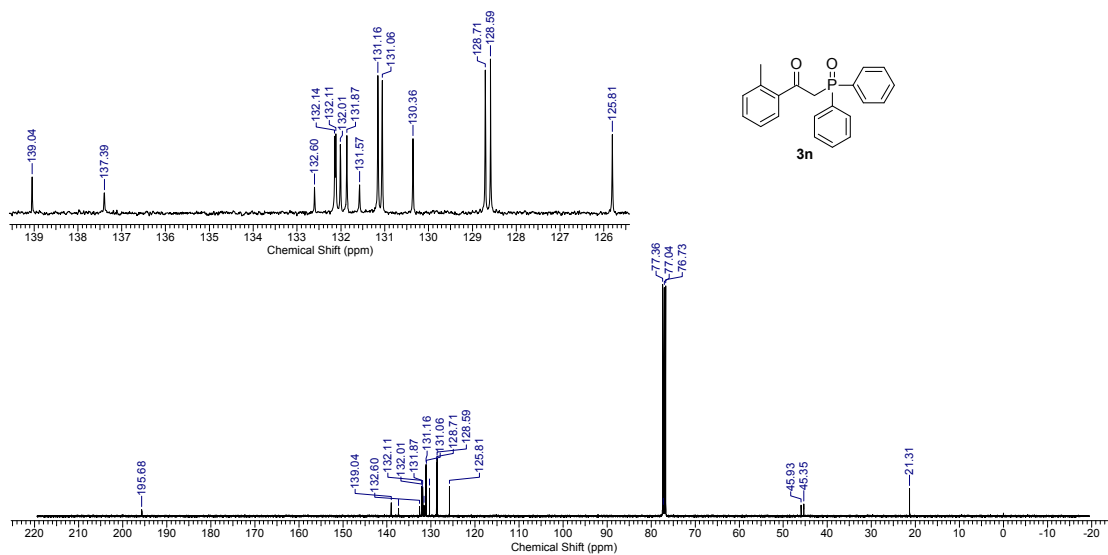

Figure S55. <sup>13</sup>C NMR spectrum of compound 3n

17-w-hmm-10.26\_8331001r

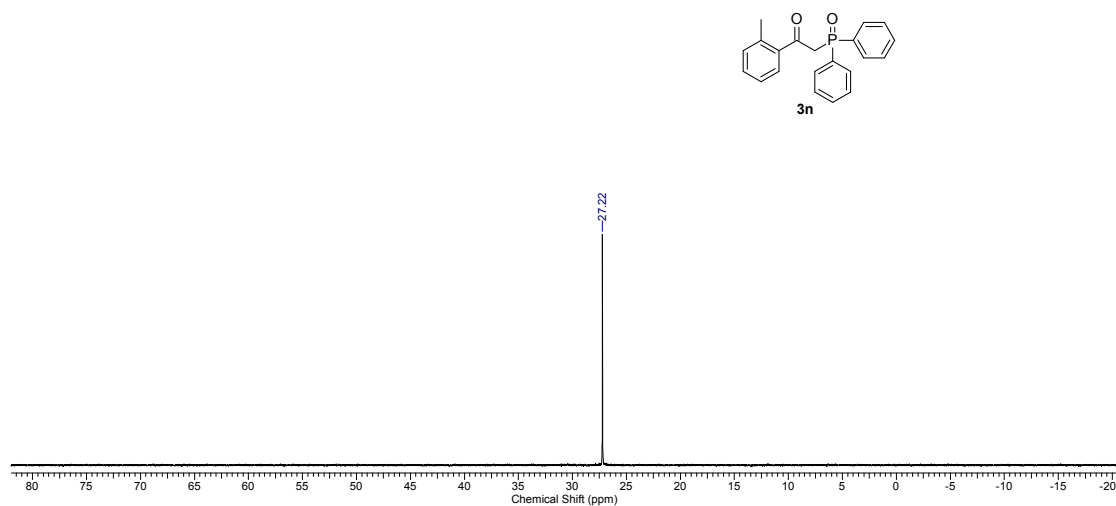

Figure S56. <sup>31</sup>P NMR spectrum of compound 3n

8340-ZXL-365\_000001r.esp

8340-ZXL-365\_000001r.esp

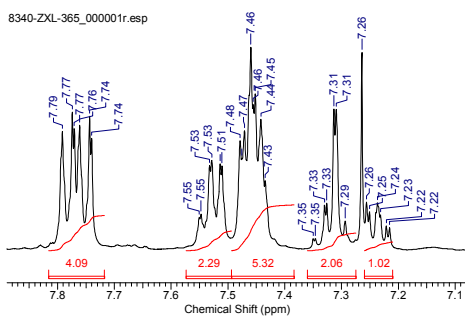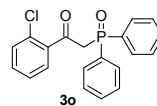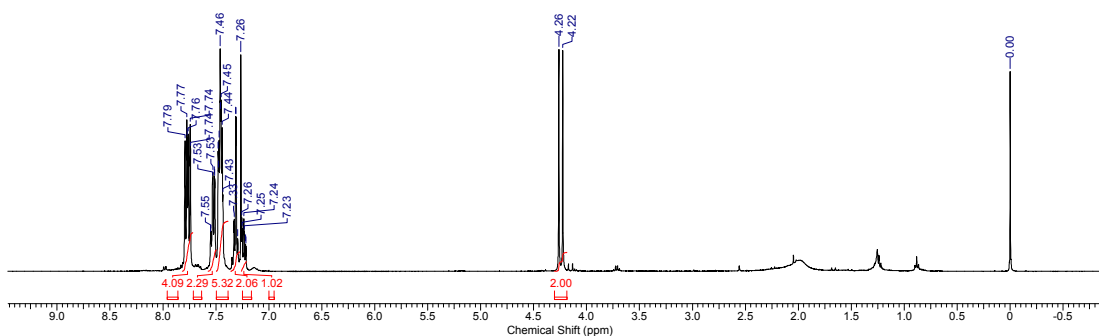

Figure S57. <sup>1</sup>H NMR spectrum of compound **3o**

8342-ZXL-365-C\_000001r.esp

8342-ZXL-365-C\_000001r.esp

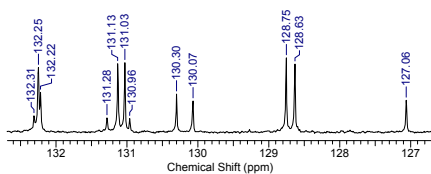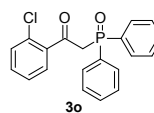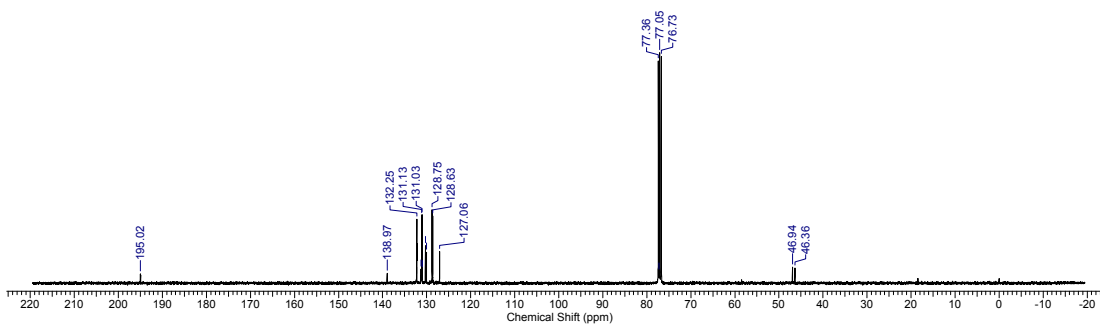

Figure S58. <sup>13</sup>C NMR spectrum of compound **3o**



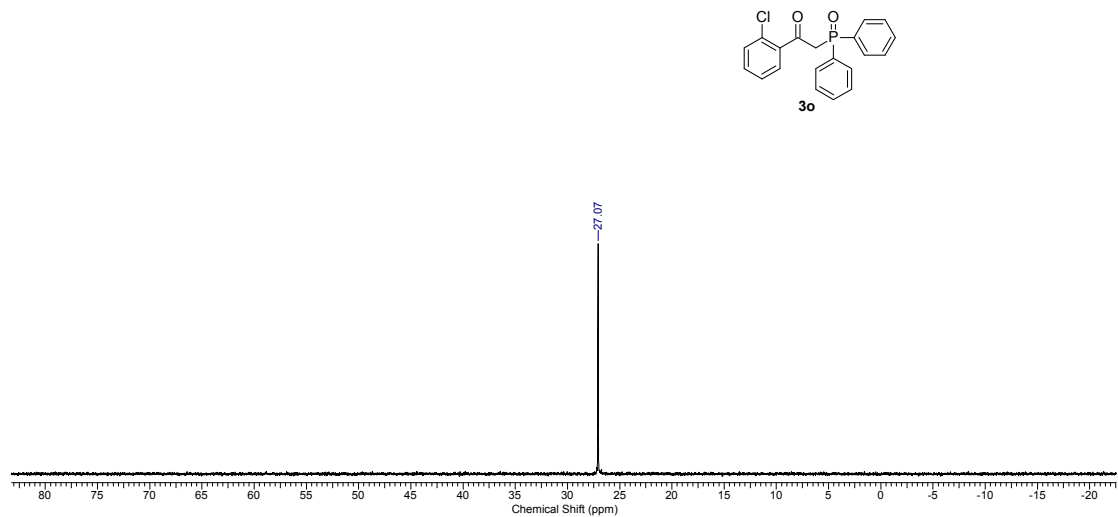Figure S59. <sup>31</sup>P NMR spectrum of compound **3o**8350-ZXL-367\_000001r.esp  
8350-ZXL-367\_000001r.esp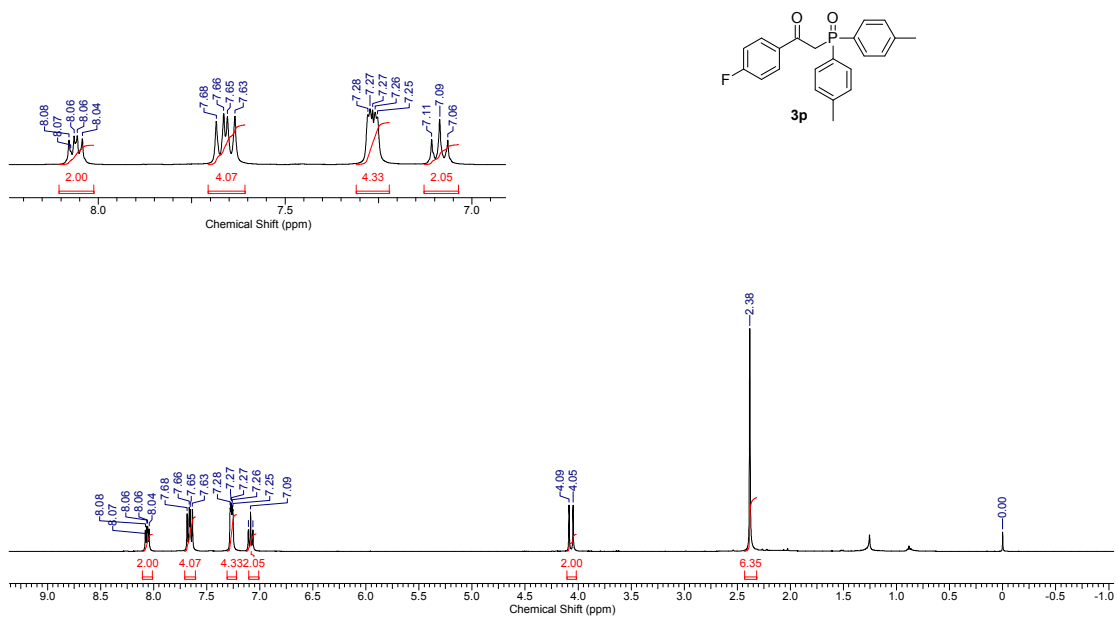Figure S60. <sup>1</sup>H NMR spectrum of compound **3p**

8353-ZXL-367-C\_000001r  
8353-ZXL-367-C\_000001r

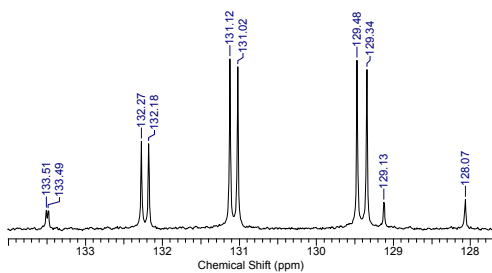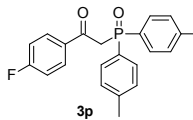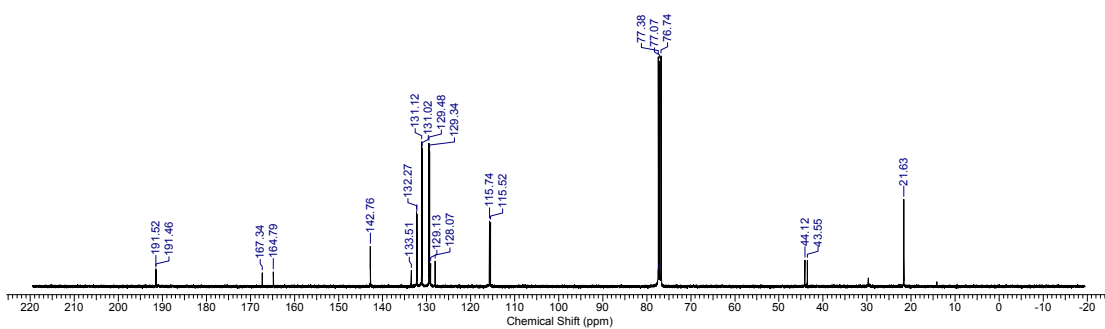

**Figure S61.** <sup>13</sup>C NMR spectrum of compound **3p**

17-w-hmm-10.26\_8351001r

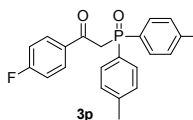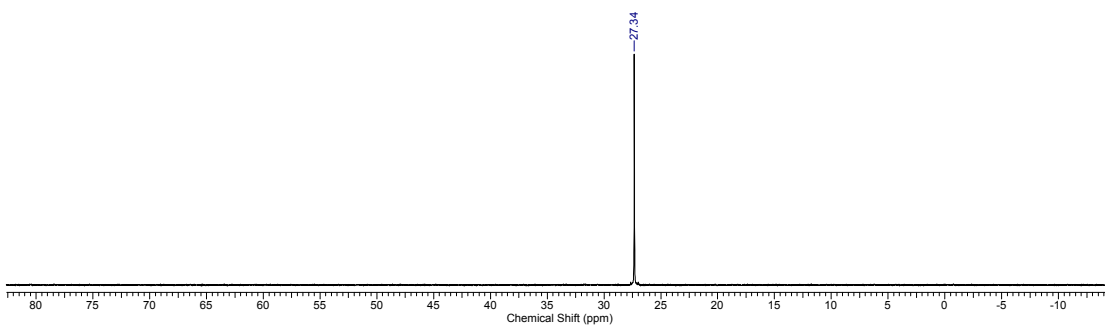

**Figure S62.** <sup>31</sup>P NMR spectrum of compound **3p**

8690-ZXL-362\_000001r.esp  
8690-ZXL-362\_000001r.esp

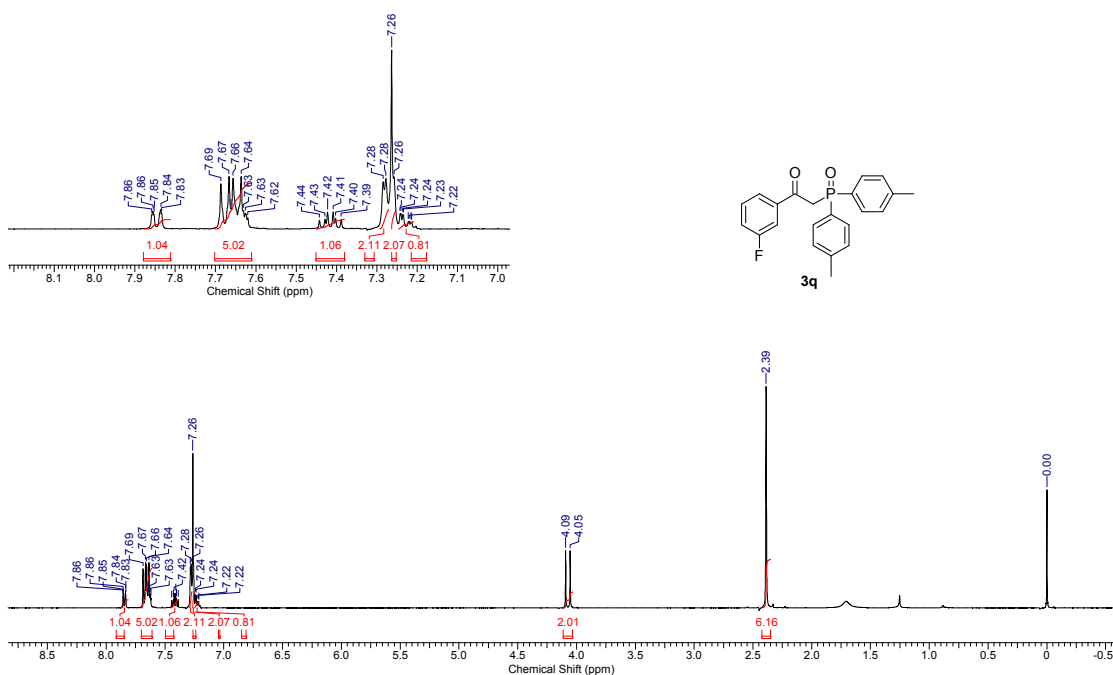

9150-zxl-362\_000001r  
9150-zxl-362\_000001r

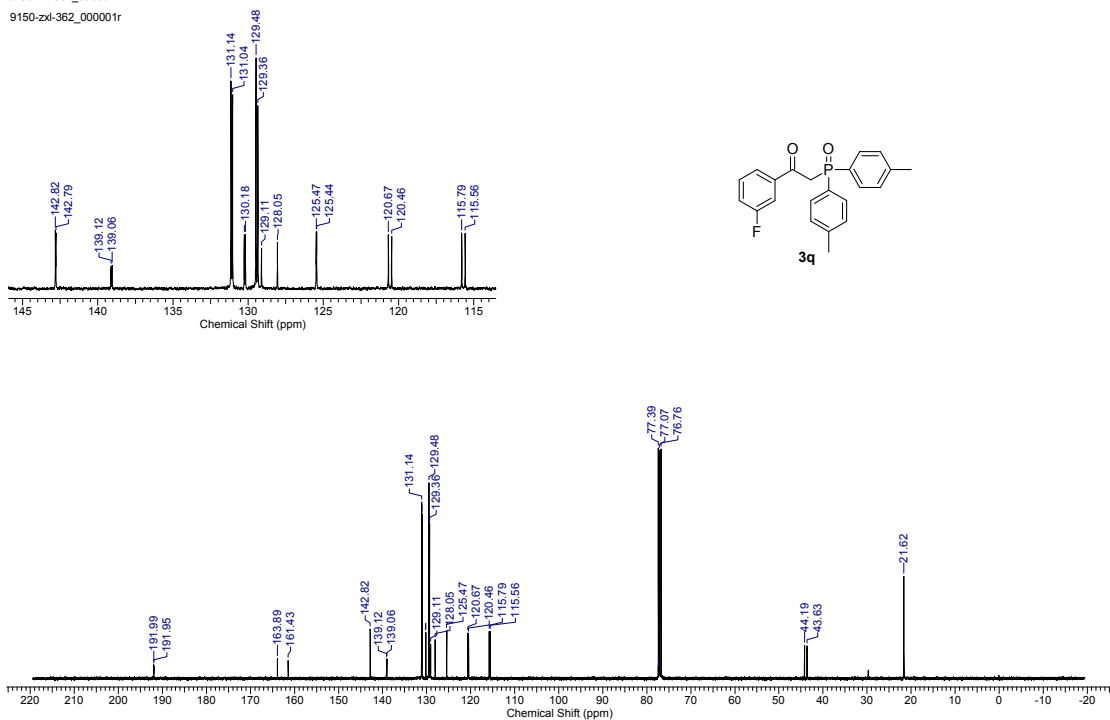

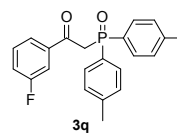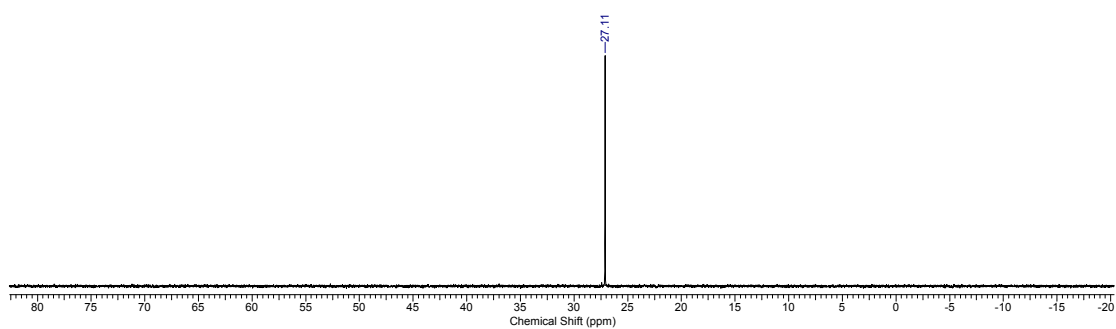

**Figure S65.**  $^{31}\text{P}$  NMR spectrum of compound **3q**

8830-ZXL-363\_000001r  
8830-ZXL-363\_000001r

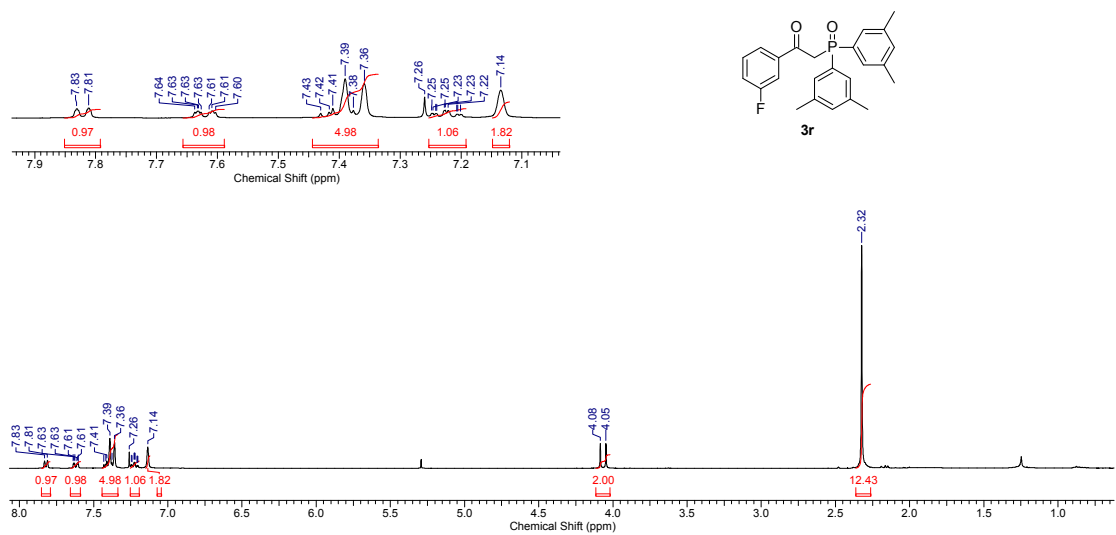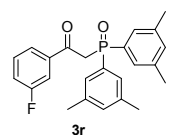

**Figure S66.**  $^1\text{H}$  NMR spectrum of compound **3r**

8832-ZXL-363\_000001r  
8832-ZXL-363\_000001r

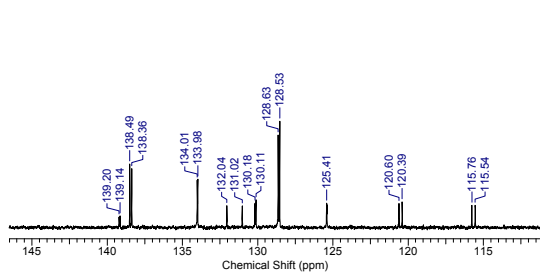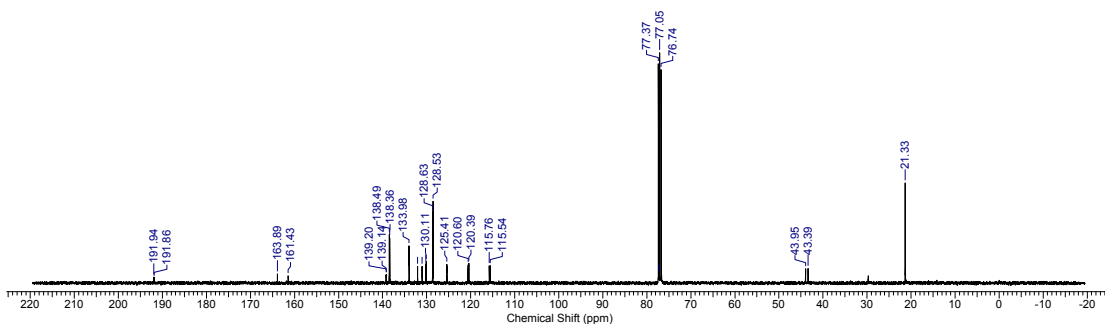

**Figure S67.**  $^{13}\text{C}$  NMR spectrum of compound **3r**

17-w-hmm-17.11.2\_8831001r

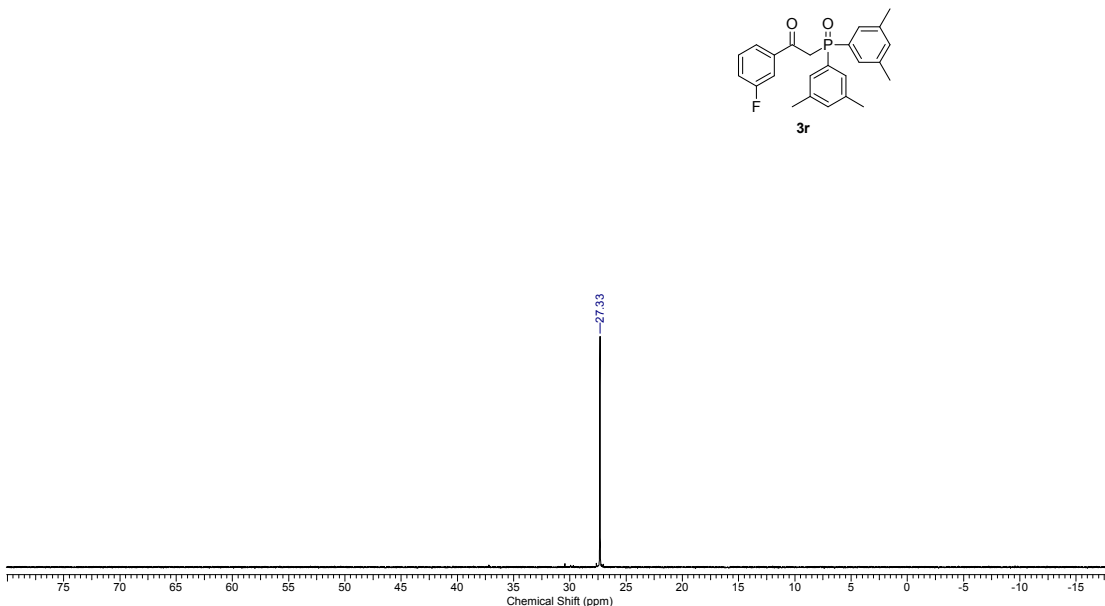

**Figure S68.**  $^{31}\text{P}$  NMR spectrum of compound **3r**

## 8. The IR spectra of the complexes 7

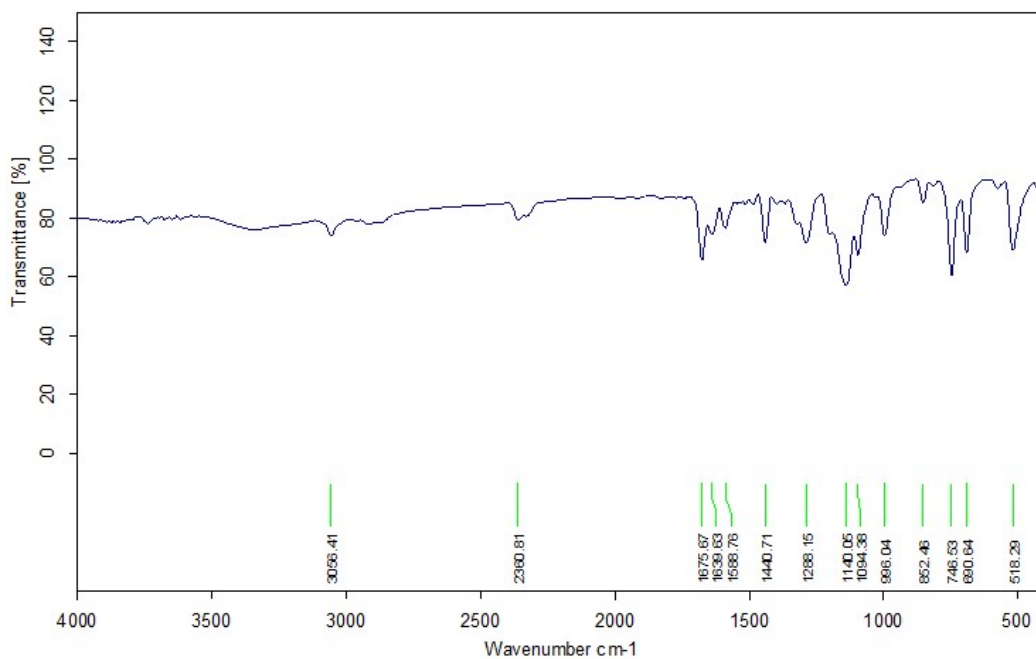

**Figure S69.** IR spectra of compound **7a**

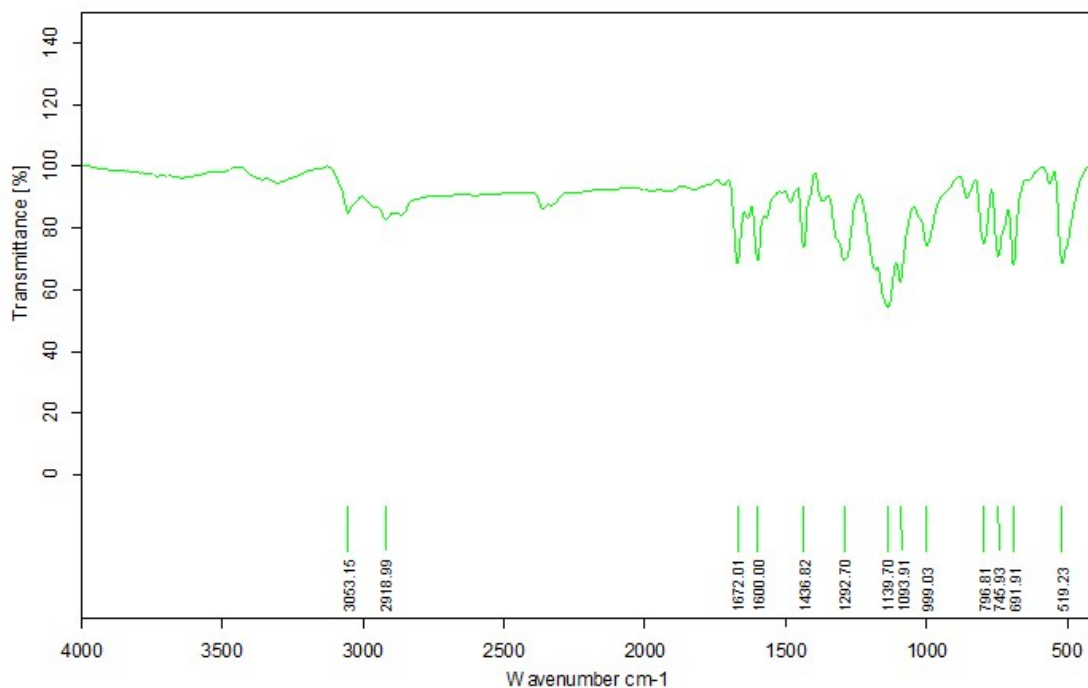

**Figure S70.** IR spectra of compound **7b**

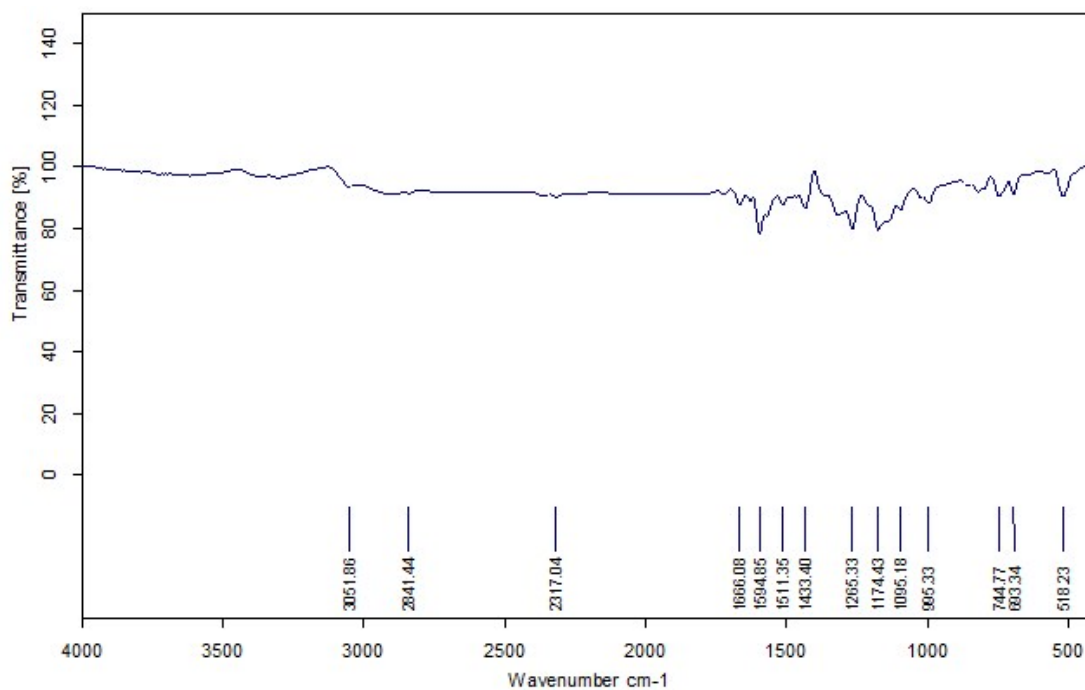

**Figure S71.** IR spectra of compound 7c

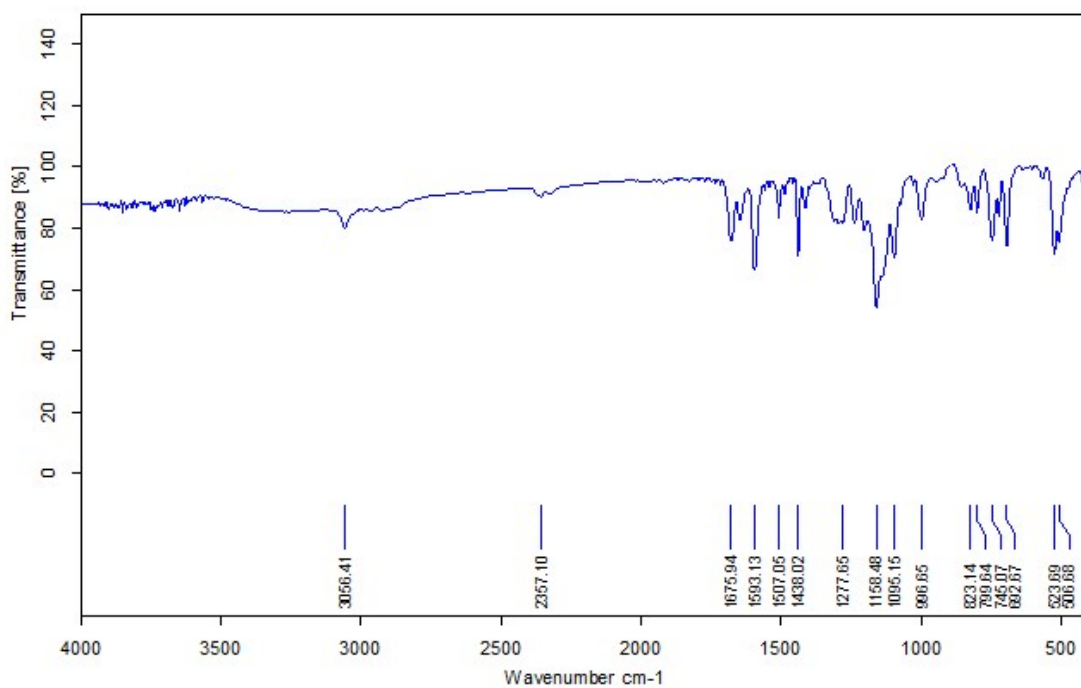

**Figure S72.** IR spectra of compound 7d

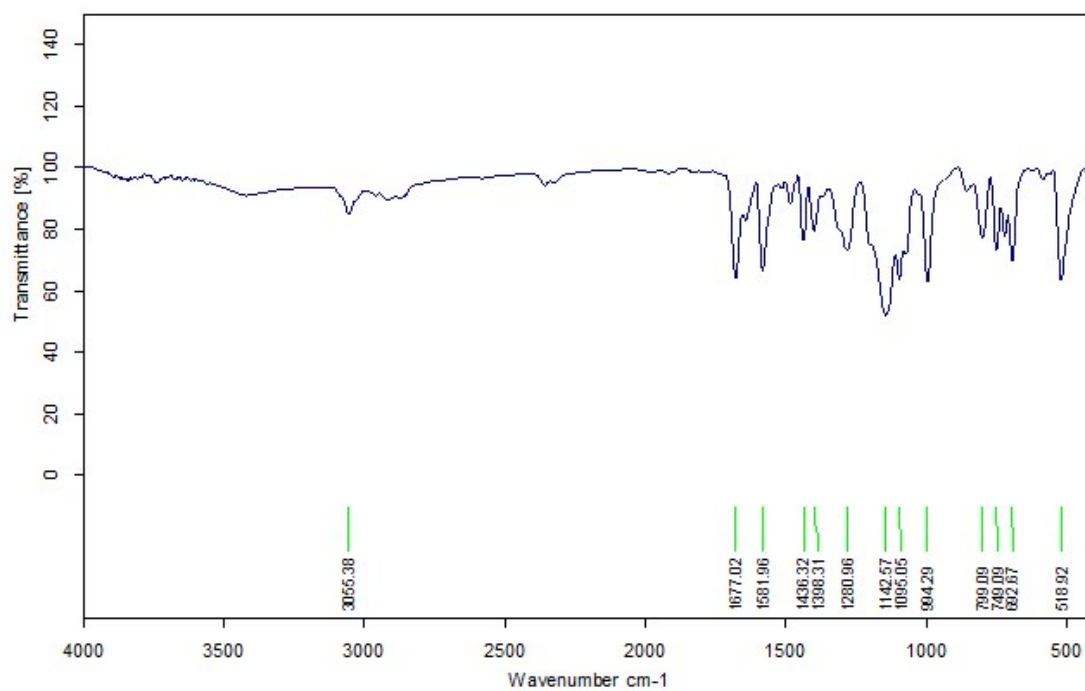

**Figure S73.** IR spectra of compound **7e**

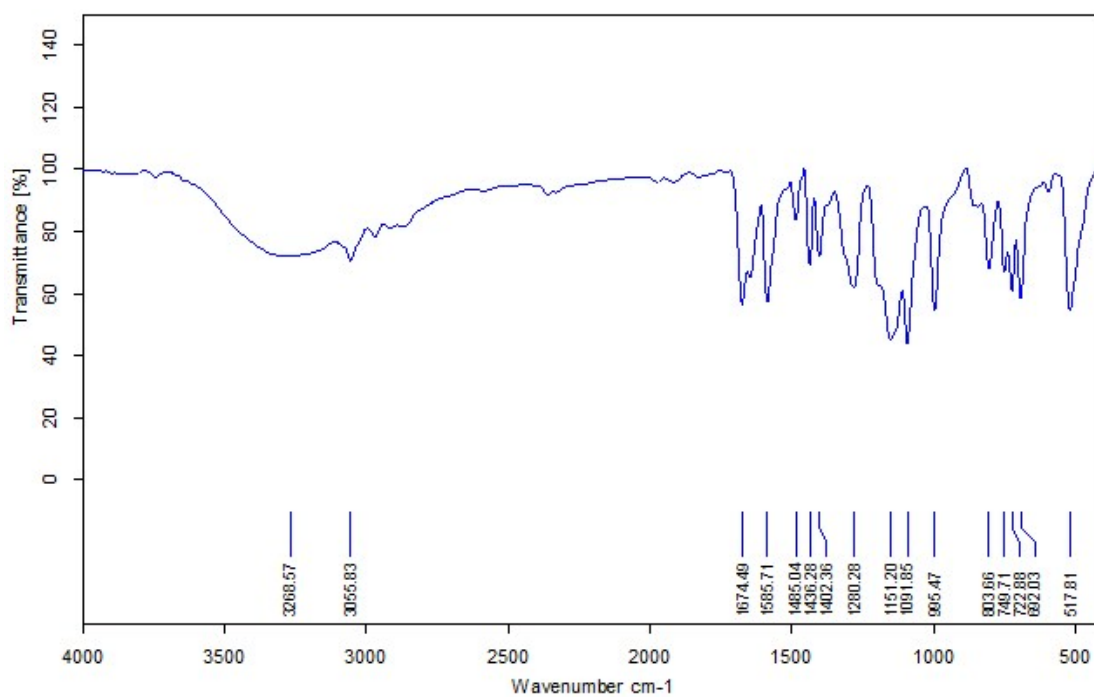

**Figure S74.** IR spectra of compound **7f**



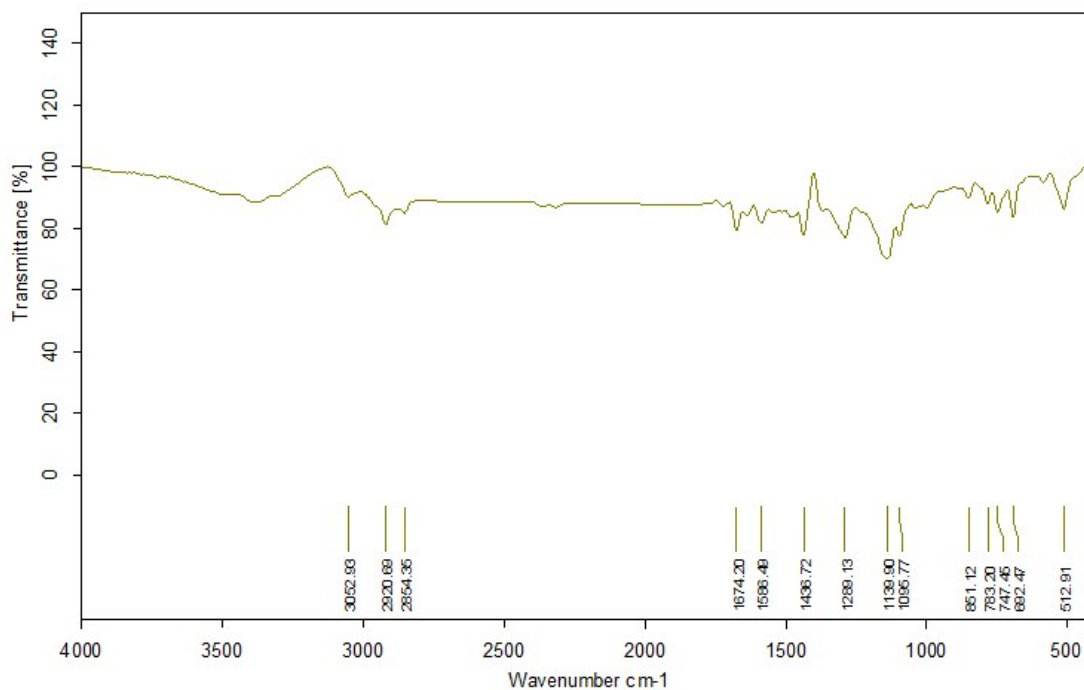

**Figure S75.** IR spectra of compound **7g**

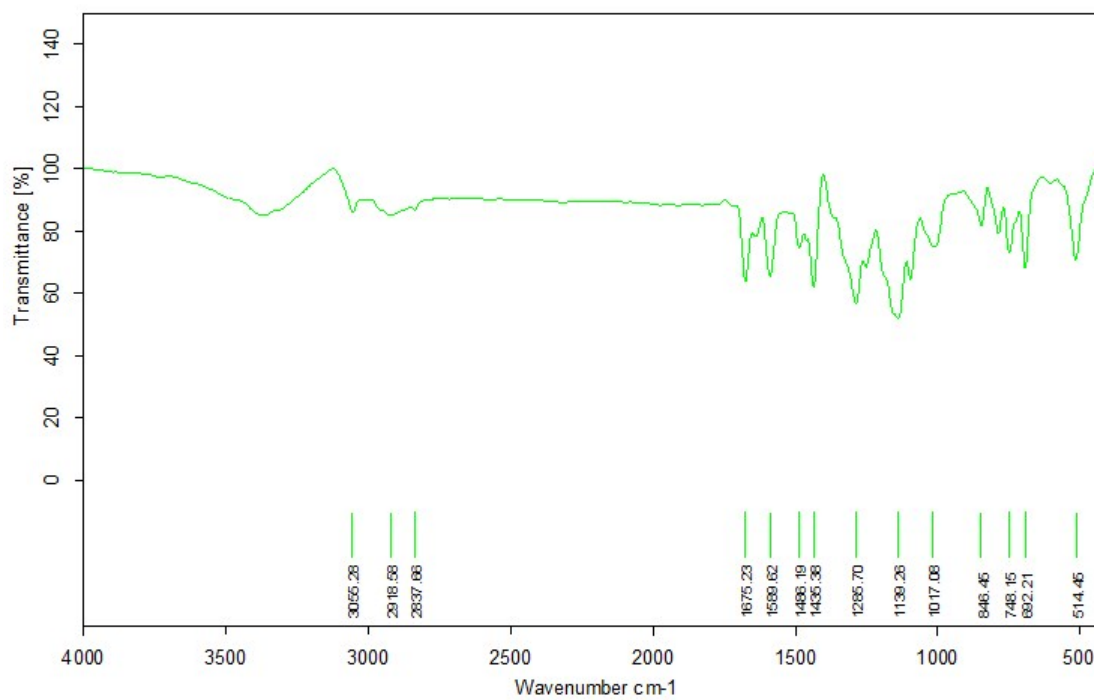

**Figure S76.** IR spectra of compound **7h**

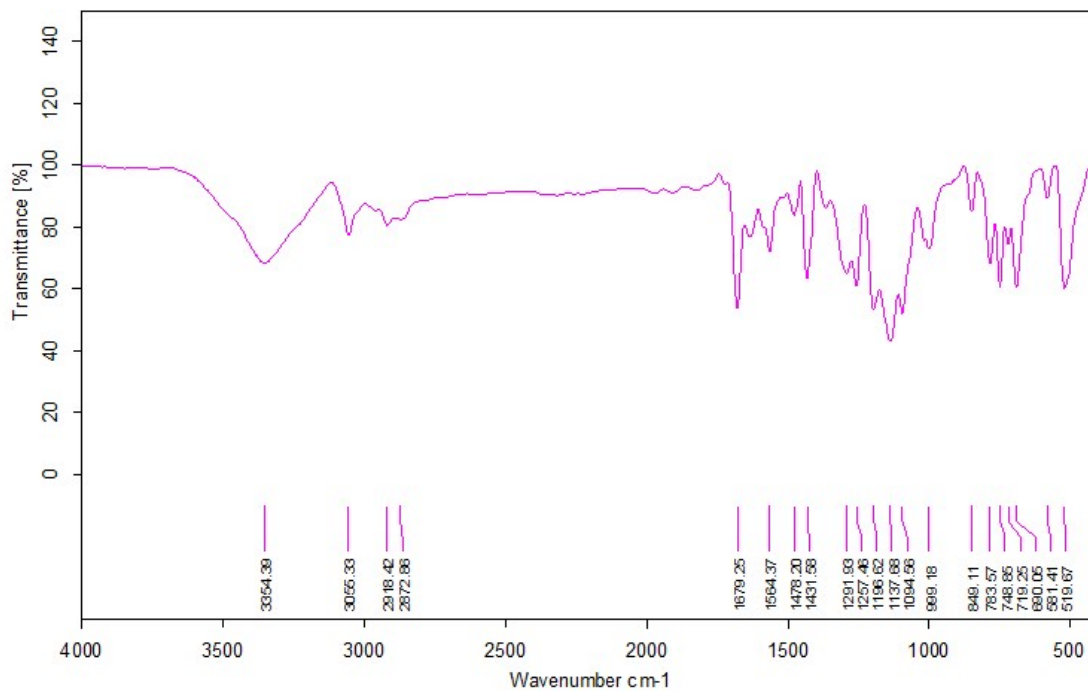

**Figure S77.** IR spectra of compound **7i**

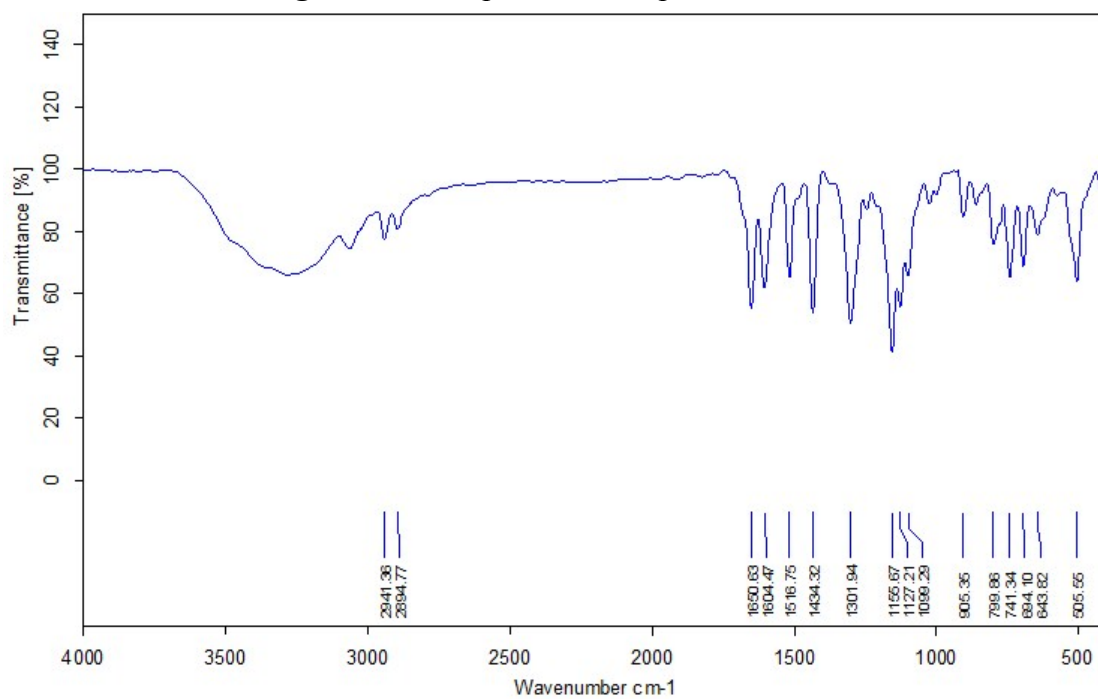

**Figure S78.** IR spectra of compound **7j**

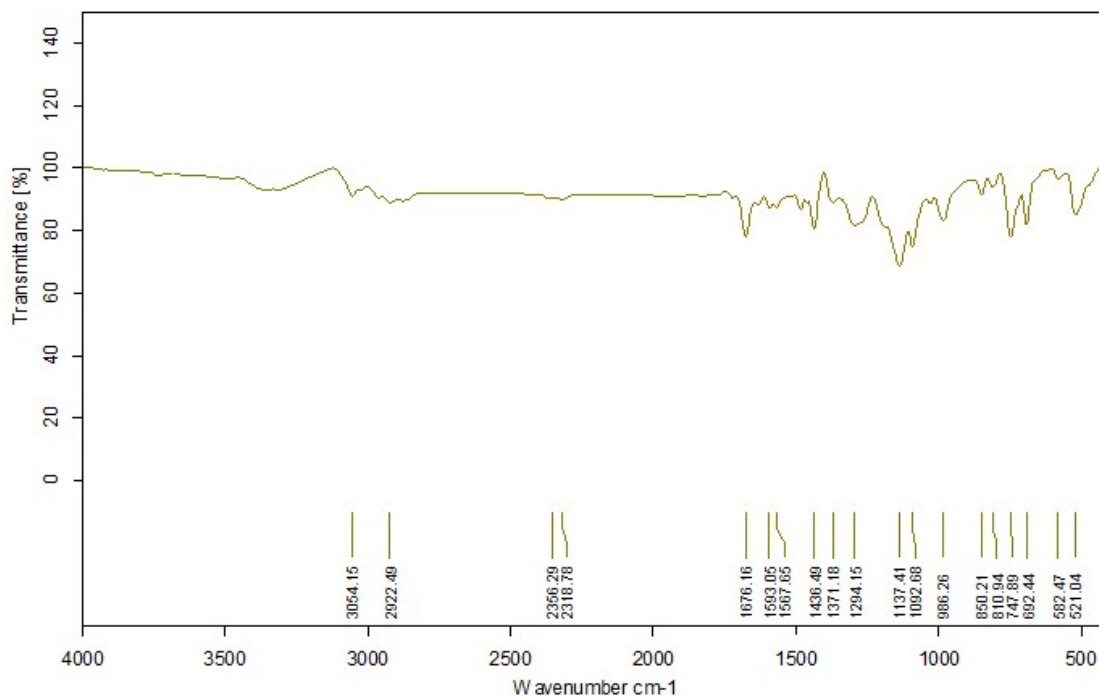

Figure S79. IR spectra of compound 7k

## 9. Determination of Structure of 3a

The structure of **3a** was determined by the X-ray diffraction. Recrystallized from EtOH/dichloromethane. Further information can be found in the CIF file. The crystal was deposited in the Cambridge Crystallographic Data Centre and assigned as CCDC **1811537**.

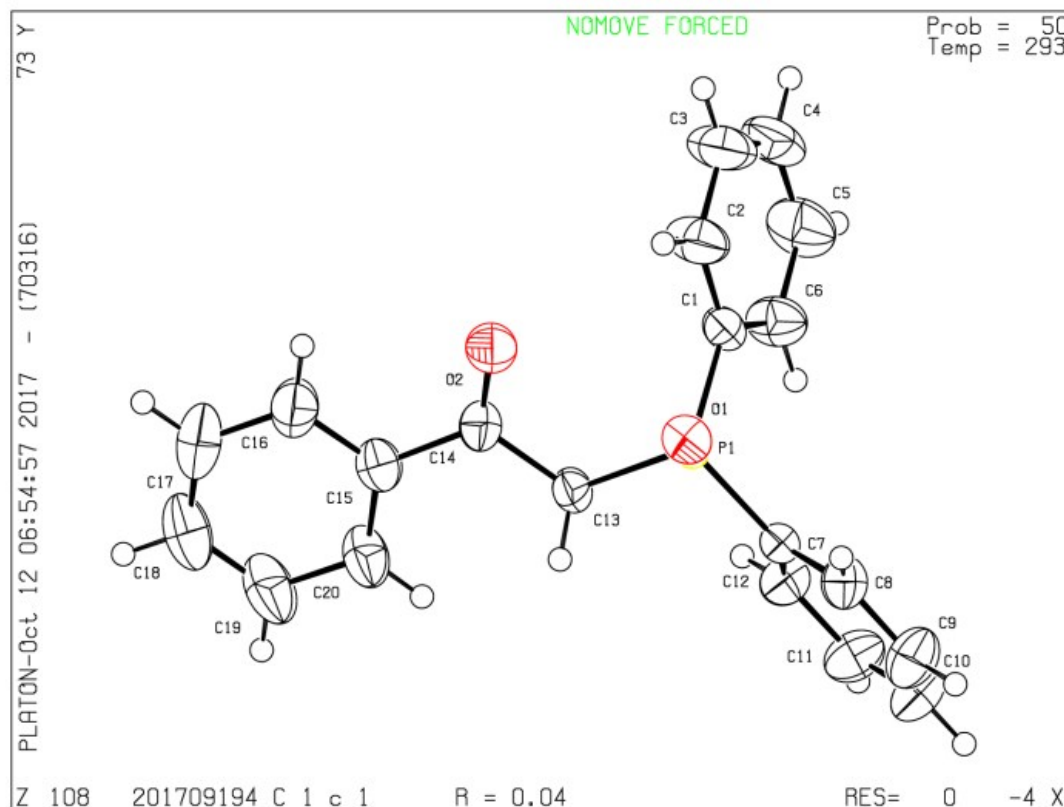

**Table 1 Crystal data and structure refinement for 3a.**

|                                             |                                                               |
|---------------------------------------------|---------------------------------------------------------------|
| Identification code                         | 201709194                                                     |
| Empirical formula                           | C <sub>20</sub> H <sub>17</sub> O <sub>2</sub> P              |
| Formula weight                              | 320.30                                                        |
| Temperature/K                               | 293(2)                                                        |
| Crystal system                              | monoclinic                                                    |
| Space group                                 | Cc                                                            |
| a/Å                                         | 16.191(2)                                                     |
| b/Å                                         | 17.7337(7)                                                    |
| c/Å                                         | 8.5986(11)                                                    |
| α/°                                         | 90                                                            |
| β/°                                         | 137.72(3)                                                     |
| γ/°                                         | 90                                                            |
| Volume/Å <sup>3</sup>                       | 1660.8(6)                                                     |
| Z                                           | 4                                                             |
| ρ <sub>calc</sub> /cm <sup>3</sup>          | 1.281                                                         |
| μ/mm <sup>-1</sup>                          | 1.517                                                         |
| F(000)                                      | 672.0                                                         |
| Crystal size/mm <sup>3</sup>                | 0.22 × 0.18 × 0.15                                            |
| Radiation                                   | CuKα (λ = 1.54184)                                            |
| 2θ range for data collection/°              | 9.53 to 134.066                                               |
| Index ranges                                | -19 ≤ h ≤ 16, -16 ≤ k ≤ 21, -10 ≤ l ≤ 10                      |
| Reflections collected                       | 2986                                                          |
| Independent reflections                     | 1764 [R <sub>int</sub> = 0.0225, R <sub>sigma</sub> = 0.0358] |
| Data/restraints/parameters                  | 1764/2/208                                                    |
| Goodness-of-fit on F <sup>2</sup>           | 1.072                                                         |
| Final R indexes [I ≥ 2σ (I)]                | R <sub>1</sub> = 0.0374, wR <sub>2</sub> = 0.0923             |
| Final R indexes [all data]                  | R <sub>1</sub> = 0.0405, wR <sub>2</sub> = 0.0969             |
| Largest diff. peak/hole / e Å <sup>-3</sup> | 0.29/-0.24                                                    |
| Flack parameter                             | 0.07(3)                                                       |
